# Supplementary material for: Per- and polyfluoroalkyl substances (PFAS) in white-tailed sea eagle eggs from Sweden: temporal trends (1969–2021), spatial variations, fluorine mass balance, and suspect screening
Source: Royal Society of Chemistry journal article supplement (doi:10.1039/d3em00141e), 2023-01-01
Supplement: d3em00141e2.xlsx [file d3em00141e2.xlsx]

## Sheet: Sheet1
Table S7																												Fragments found
Structures	Class	Name	ID	Formula (neutral)	Molecular weight	m/z	PeakPolarity	Adduct	Charge State	Retention Time	Fragment 1	Fragment 2	Fragment 3	Fragment 4	standard in house	SMILES	CAS	Detected in	detected by	Literature	Last modified by	Comment	Gulf of Bothnia	Northern Inland	Baltic Proper	RT (min)
																							Avg	Avg	Avg
	X:3 FTCAs	X:3 FTCAs x=3	3:3 FTCA	C6F7O2H5	242.018	241.011	Negative	M-H	1	2.3	116.995	-			x			biota	Kyra	Spaan-2020			0	0	0
	X:3 FTCAs	X:3 FTCAs x=4	4:3 FTCA	C7F9O2H5	292.015	291.007	Negative	M-H	1	2.8	166.992	-						biota	Kyra	Spaan-2020			0	0	0
	X:3 FTCAs	X:3 FTCAs x=5	5:3 FTCA	C8F11O2H5	342.012	341.004	Negative	M-H	1	3.3	216.989	236.994			x			biota	Kyra	Spaan-2020			0	0	0
	X:3 FTCAs	X:3 FTCAs x=6	6:3 FTCA	C9F13O2H5	392.009	391.001	Negative	M-H	1	4	266.986	286.992						biota	Kyra	Spaan-2020			0	0	0
	X:3 FTCAs	X:3 FTCAs x=7	7:3 FTCA	C10F15O2H5	442.006	440.998	Negative	M-H	1	4.6	316.982	266.986	336.988		x			biota	Kyra	Spaan-2020			6699899	1.41302e+06	6.34097e+06	4.2	Spaan-2020	316.98 [C9F11]-	266.99 [C8F9]-
	X:3 FTCAs	X:3 FTCAs x=8	8:3 FTCA	C11F17O2H5	492.002	490.995	Negative	M-H	1	5.2	366.979	316.982						biota	Kyra	Spaan-2020			1.04632e+07	4770333	9.27889e+06	4.7	Spaan-2020	366.98 [C10F13]-	316.98 [C9F11]-	62.99 [CO2F]-
	X:3 FTCAs	X:3 FTCAs x=9	9:3 FTCA	C12F19O2H5	541.999	540.991	Negative	M-H	1	5.7	416.976	366.979						biota	Kyra	Spaan-2020			7657793	4.79026e+06	6.38714e+06	5.15	Spaan-2020	416.98 [C11F15]-	366.98 [C10F13]-
	X:3 FTCAs	X:3 FTCAs x=10	10:3 FTCA	C13F21O2H5	591.996	590.988	Negative	M-H	1	6.2	466.973	-						biota	Kyra	Spaan-2020			698301	0	100240	5.58	Spaan-2020
	X:3 FTCAs	X:3 FTCAs x=11	11:3 FTCA	C14F23O2H5	641.993	640.985	Negative	M-H	1	6.6	516.969							biota	Kyra	Spaan-2020			0	374808	191631	5.99	Spaan-2020
	X:2 FTSAs	X:2 FTSAs x=4	4:2 FTSA	C6F9SO3H5	327.982	326.974	Negative	M-H	1	2.8	80.9646	79.9568			x			biota	Kyra	Spaan-2020			0	0	0
	X:2 FTSAs	X:2 FTSAs x=6	6:2 FTSA	C8F13SO3H5	427.976	426.968	Negative	M-H	1	3.8	80.9646	79.9568			x			biota	Kyra	Spaan-2020			42305.2	97104	0	3.08	Spaan-2020
	X:2 FTSAs	X:2 FTSAs x=8	8:2 FTSA	C10F17SO3H5	527.969	526.962	Negative	M-H	1	4.8	80.9646	79.9568			x			biota	Kyra	Spaan-2020			35519	0	487997	3.87	Spaan-2020
	X:2 FTSAs	X:2 FTSAs x=10	10:2 FTSA	C12F21SO3H5	627.963	626.955	Negative	M-H	1	5.7	80.9646	79.9568						biota	Kyra	Spaan-2020			85080	0	980170	4.57	Spaan-2020
	X:2 FTSAs	X:2 FTSAs x=12	12:2 FTSA	C14F25SO3H5	727.957	726.949	Negative	M-H	1	6.5	80.9646	79.9568						biota	Kyra	Spaan-2020			0	0	0
			C12H9F15NO4S	C12H9F15NO4SH	549.01	548.002	Negative	M-H	1	4.4	124.007	-						biota	Kyra	Spaan-2020			0	0	243437	3.55	Spaan-2020
			C13H9F17NO4S	C13H9F17NO4SH	599.006	597.999	Negative	M-H	1	4.9	124.007	-						biota	Kyra	Spaan-2020			338500	537691	1.87518e+06	3.91	Spaan-2020	124.00 [C2H6NO3S]-
			C14H9F19NO4S	C14H9F19NO4SH	649.003	647.995	Negative	M-H	1	5.3	124.007	-						biota	Kyra	Spaan-2020			3.15915e+06	3.01378e+06	6599328	4.25	Spaan-2020	124.00 [C2H6NO3S]-	79.96 [SO3]-	647.99 [M-H]-
			C15H9F21NO4S	C15H9F21NO4SH	699	697.992	Negative	M-H	1	5.7	124.007	-						biota	Kyra	Spaan-2020			1.29478e+06	739798	1.35402e+06	4.57	Spaan-2020	124.00 [C2H6NO3S]-
			C16H9F23NO4S	C16H9F23NO4SH	748.997	747.989	Negative	M-H	1	6.2	124.007	-						biota	Kyra	Spaan-2020			1523624	1.08279e+06	1.81591e+06	4.91	Spaan-2020	124.00 [C2H6NO3S]-
	Cl-substituted,ether-substituted perfluoroalkyl (linear)sulfonic acids	Cl-substituted,ether-substituted perfluoroalkyl (linear)sulfonic acids, n=4	ClOPFLSA n=4	C6HF12O4SCl	431.91	430.902	Negative	M-H	1		-	-				S(=O)(O)(=O)C(F)(F)C(F)(F)OC(F)(F)C(F)(F)C(F)(F)C(F)(F)Cl				Liu-2019, Wang-2021	Melanie		0	0	0
	Cl-substituted,ether-substituted perfluoroalkyl (linear)sulfonic acids	Cl-substituted,ether-substituted perfluoroalkyl (linear)sulfonic acids, n=5	ClOPFLSA n=5	C7HF14O4SCl	481.907	480.899	Negative	M-H	1		-	-				S(=O)(O)(=O)C(F)(F)C(F)(F)OC(F)(F)C(F)(F)C(F)(F)C(F)(F)C(F)(F)Cl				Liu-2019, Wang-2021	Melanie		0	0	0
	Cl-substituted,ether-substituted perfluoroalkyl (linear)sulfonic acids	Cl-substituted,ether-substituted perfluoroalkyl (linear)sulfonic acids, n=6	ClOPFLSA n=6	C8HF16O4SCl	531.903	530.896	Negative	M-H	1		-	-				S(=O)(O)(=O)C(F)(F)C(F)(F)OC(F)(F)C(F)(F)C(F)(F)C(F)(F)C(F)(F)C(F)(F)Cl	756426−58−1			Liu-2019, Wang-2021	Melanie		0	0	0
	Cl-substituted,ether-substituted perfluoroalkyl (linear)sulfonic acids	Cl-substituted,ether-substituted perfluoroalkyl (linear)sulfonic acids, n=7	ClOPFLSA n=7	C9HF18O4SCl	581.9	580.892	Negative	M-H	1		-	-				S(=O)(O)(=O)C(F)(F)C(F)(F)OC(F)(F)C(F)(F)C(F)(F)C(F)(F)C(F)(F)C(F)(F)C(F)(F)Cl				Liu-2019, Wang-2021	Melanie		0	0	0
	Cl-substituted,ether-substituted perfluoroalkyl (linear)sulfonic acids	Cl-substituted,ether-substituted perfluoroalkyl (linear)sulfonic acids, n=8	ClOPFLSA n=8	C10HF20O4SCl	631.897	630.889	Negative	M-H	1		-	-				S(=O)(O)(=O)C(F)(F)C(F)(F)OC(F)(F)C(F)(F)C(F)(F)C(F)(F)C(F)(F)C(F)(F)C(F)(F)C(F)(F)Cl				Liu-2019, Wang-2022	Melanie		0	0	0
	Cl-substituted,ether-substituted perfluoroalkyl (linear)sulfonic acids	Cl-substituted,ether-substituted perfluoroalkyl (linear)sulfonic acids, n=10	ClOPFLSA n=10	C12HF24O4SCl	731.891	730.883	Negative	M-H	1		550.932	-				S(=O)(O)(=O)C(F)(F)C(F)(F)OC(F)(F)C(F)(F)C(F)(F)C(F)(F)C(F)(F)C(F)(F)C(F)(F)C(F)(F)C(F)(F)C(F)(F)Cl				Liu-2019, Wang-2021	Melanie		0	0	0
	Cl-substituted,ether-substituted perfluoroalkyl (linear)sulfonic acids	Cl-substituted,ether-substituted perfluoroalkyl (linear)sulfonic acids, n=12	ClOPFLSA n=12	C14HF28O4SCl	831.884	830.876	Negative	M-H	1		-	-				S(=O)(O)(=O)C(F)(F)C(F)(F)OC(F)(F)C(F)(F)C(F)(F)C(F)(F)C(F)(F)C(F)(F)C(F)(F)C(F)(F)C(F)(F)C(F)(F)C(F)(F)C(F)(F)Cl				Liu-2019, Wang-2021	Melanie		0	0	0
	Cl-substituted perfluoroalkyl (linear) carboxylic acids	Cl-substituted perfluoroalkyl (linear) carboxylic acids, n=7	ClPFLCAs n=7	C8HF14O2Cl	429.945	428.937	Negative	M-H	1		-	-								Liu-2019			0	28159.3	61846	3.35	Liu-2019
	Cl-substituted perfluoroalkyl (linear) carboxylic acids	Cl-substituted perfluoroalkyl (linear) carboxylic acids, n=8	ClPFLCAs n=8	C9HF16O2Cl	479.941	478.934	Negative	M-H	1		-	-								Liu-2019			0	0	60393	3.77	Liu-2019
	Cl-substituted perfluoroalkyl (linear) carboxylic acids	Cl-substituted perfluoroalkyl (linear) carboxylic acids, n=9	ClPFLCAs n=9	C10HF18O2Cl	529.938	528.93	Negative	M-H	1		-	-								Liu-2019			0	130671	0	4.13	Liu-2019
	Cl-substituted perfluoroalkyl (linear) carboxylic acids	Cl-substituted perfluoroalkyl (linear) carboxylic acids, n=10	ClPFLCAs n=10	C11HF20O2Cl	579.935	578.927	Negative	M-H	1		-	-								Liu-2019			0	0	52577.3	4.47	Liu-2019
	Cl-substituted perfluoroalkyl (linear) carboxylic acids	Cl-substituted perfluoroalkyl (linear) carboxylic acids, n=11	ClPFLCAs n=11	C12HF22O2Cl	629.932	628.924	Negative	M-H	1		-	-								Liu-2019			0	0	432313	4.81	Liu-2019
	Cl-substituted perfluoroalkyl (linear) carboxylic acids	Cl-substituted perfluoroalkyl (linear) carboxylic acids, n=12	ClPFLCAs n=12	C13HF24O2Cl	679.929	678.921	Negative	M-H	1		-	-								Liu-2019			0	0	0
	Cl-substituted perfluoroalkyl (linear) carboxylic acids	Cl-substituted perfluoroalkyl (linear) carboxylic acids, n=13	ClPFLCAs n=13	C14HF26O2Cl	729.926	728.918	Negative	M-H	1		-	-								Liu-2019			0	0	0
	Cl-substituted perfluoroalkyl (linear) carboxylic acids	Cl-substituted perfluoroalkyl (linear) carboxylic acids, n=14	ClPFLCAs n=14	C15HF28O2Cl	779.922	778.915	Negative	M-H	1		-	-								Liu-2019			0	0	0
	Cl-substituted perfluoroalkyl (linear) sulfonic acids_i	Cl-substituted perfluoroalkyl (linear) sulfonic acids_i, n=5	ClPFLSA_i n=5	C6HF12O3SCl	415.915	414.907	Negative	M-H	1		-	-				S(=O)(O)(=O)C(F)(Cl)C(F)(F)C(F)(F)C(F)(F)C(F)(F)C(F)(F)F				Liu-2019, Wang-2021	Melanie		0	0	0
	double bond-di-ether-/cyclic di-ether-/keton-ether- perfluoroalkyl (linear) carboxylic acids	double bond-di-ether-/cyclic di-ether-/keton-ether- perfluoroalkyl (linear) carboxylic acids, n=6	d-diO-/C-diO-/K-O-PFLSA n=6	C6HF11O5S	393.937	392.93	Negative	M-H	1		-	-								Liu-2019			0	0	0
	double bond-di-ether-/cyclic di-ether-/keton-ether- perfluoroalkyl (linear) carboxylic acids	double bond-di-ether-/cyclic di-ether-/keton-ether- perfluoroalkyl (linear) carboxylic acids, n=7	d-diO-/C-diO-/K-O-PFLSA n=7	C7HF13O5S	443.934	442.926	Negative	M-H	1		-	-								Liu-2019			0	0	0
	double bond-di-ether-/cyclic di-ether-/keton-ether- perfluoroalkyl (linear) carboxylic acids	double bond-di-ether-/cyclic di-ether-/keton-ether- perfluoroalkyl (linear) carboxylic acids, n=8	d-diO-/C-diO-/K-O-PFLSA n=8	C8HF15O5S	493.931	492.923	Negative	M-H	1		-	-								Liu-2019			0	0	0
	double bond-di-ether-/cyclic di-ether-/keton-ether- perfluoroalkyl (linear) carboxylic acids	double bond-di-ether-/cyclic di-ether-/keton-ether- perfluoroalkyl (linear) carboxylic acids, n=9	d-diO-/C-diO-/K-O-PFLSA n=9	C9HF17O5S	543.928	542.92	Negative	M-H	1		-	98.9547								Liu-2019			0	0	0
	double bond-di-ether-/cyclic di-ether-/keton-ether- perfluoroalkyl (linear) carboxylic acids	double bond-di-ether-/cyclic di-ether-/keton-ether- perfluoroalkyl (linear) carboxylic acids, n=10	d-diO-/C-diO-/K-O-PFLSA n=10	C10HF19O5S	593.925	592.917	Negative	M-H	1		-	-								Liu-2019			0	0	0
	double bond-di-ether-/cyclic di-ether-/keton-ether- perfluoroalkyl (linear) carboxylic acids	double bond-di-ether-/cyclic di-ether-/keton-ether- perfluoroalkyl (linear) carboxylic acids, n=11	d-diO-/C-diO-/K-O-PFLSA n=11	C11HF21O5S	643.921	642.914	Negative	M-H	1		-	-								Liu-2019			0	0	0
	double bond-di-ether-/cyclic di-ether-/keton-ether- perfluoroalkyl (linear) carboxylic acids	double bond-di-ether-/cyclic di-ether-/keton-ether- perfluoroalkyl (linear) carboxylic acids, n=12	d-diO-/C-diO-/K-O-PFLSA n=12	C12HF23O5S	693.918	692.91	Negative	M-H	1		-	-								Liu-2019			0	0	0
	double bond-di-ether-/cyclic di-ether-/keton-ether- perfluoroalkyl (linear) carboxylic acids	double bond-di-ether-/cyclic di-ether-/keton-ether- perfluoroalkyl (linear) carboxylic acids, n=13	d-diO-/C-diO-/K-O-PFLSA n=13	C13HF25O5S	743.915	742.907	Negative	M-H	1		-	-								Liu-2019			0	0	0
	double bond/cyclic PFSAs	double bond/cyclic PFSAs n=6	d/C PFSA n=6	C6F11SO3H	361.948	360.94	Negative	M-H	1	3.5	98.9547	280.982						biota	Kyra	Spaan-2020			0	0	0
	double bond/cyclic PFSAs	double bond/cyclic PFSAs n=7	d/C PFSA n=7	C7F13SO3H	411.944	410.937	Negative	M-H	1	4	98.9547	330.979						biota	Kyra	Spaan-2020			0	0	0
	double bond/cyclic PFSAs	double bond/cyclic PFSAs n=8	d/C PFSA n=8	C8F15SO3H	461.941	460.933	Negative	M-H	1	4.5	98.9547	380.976			x			biota	Kyra	Spaan-2020, Wang-2021			9603039	742300	3.8659e+07	3.65	Spaan-2020, Wang-2021	380.98 [C8F15]-	98.96 [FSO3]-
	double bond/cyclic PFSAs	double bond/cyclic PFSAs n=9	d/C PFSA n=9	C9F17SO3H	511.938	510.93	Negative	M-H	1	5	98.9547	430.972						biota	Kyra	Spaan-2020			56894.8	0	581041	4.02	Spaan-2020
	double bond/cyclic PFSAs	double bond/cyclic PFSAs n=10	d/C PFSA n=10	C10F19SO3H	561.935	560.927	Negative	M-H	1	5.5	98.9547	480.069						biota	Kyra	Spaan-2020			0	0	420878	4.38	Spaan-2020
	double bond/cyclic PFSAs	double bond/cyclic PFSAs n=11	d/C PFSA n=11	C11F21SO3H	611.932	610.924	Negative	M-H	1	5.8	98.9547	530.966						biota	Kyra	Spaan-2020			0	0	204573	4.66	Spaan-2020
	double bond/cyclic PFSAs	double bond/cyclic PFSAs n=12	d/C PFSA n=12	C12F23SO3H	661.928	660.921	Negative	M-H	1	6.1	98.9547	580.963						biota	Kyra	Spaan-2020			0	0	157955	4.88	Spaan-2020
	double bond/cyclic PFSAs	double bond/cyclic PFSAs n=13	d/C PFSA n=13	C13F25SO3H	711.925	710.917	Negative	M-H	1	6.4	98.9547	630.96						biota	Kyra	Spaan-2020			0	0	0
	double bond/cyclic PFSAs	double bond/cyclic PFSAs n=14	d/C PFSA n=14	C14F27SO3H	761.922	760.914	Negative	M-H	1	6.7	98.9547	680.956						biota	Kyra	Spaan-2020			0	0	0
	double bond perfluoroalkyl amines	double bond perfluoroalkyl amines, n=6	dPFAm n=6	C6F12N	313.984	313.984	Negative	M-	1		-	-								Liu-2019			0	0	0
	double bond perfluoroalkyl amines	double bond perfluoroalkyl amines, n=7	dPFAm n=7	C7F14N	363.981	363.981	Negative	M-	1		-	-								Liu-2019			0	0	0
	double bond perfluoroalkyl amines	double bond perfluoroalkyl amines, n=8	dPFAm n=8	C8F16N	413.978	413.978	Negative	M-	1		-	-								Liu-2019			0	0	0
	double bond perfluoroalkyl amines	double bond perfluoroalkyl amines, n=9	dPFAm n=9	C9F18N	463.975	463.975	Negative	M-	1		-	-								Liu-2019			0	0	0
	double bond perfluoroalkyl amines	double bond perfluoroalkyl amines, n=10	dPFAm n=10	C10F20N	513.972	513.972	Negative	M-	1		-	-								Liu-2019			0	0	0
	double bond perfluoroalkyl amines	double bond perfluoroalkyl amines, n=11	dPFAm n=11	C11F22N	563.968	563.968	Negative	M-	1		-	-								Liu-2019			0	0	0
	double bond perfluoroalkyl amines	double bond perfluoroalkyl amines, n=12	dPFAm n=12	C12F24N	613.965	613.965	Negative	M-	1		-	-								Liu-2019			0	0	0
	double bond perfluoroalkyl amines	double bond perfluoroalkyl amines, n=13	dPFAm n=13	C13F26N	663.962	663.962	Negative	M-	1		-	-								Liu-2019			0	0	0
	double bond perfluoroalkyl amines	double bond perfluoroalkyl amines, n=14	dPFAm n=14	C14F28N	713.959	713.959	Negative	M-	1		-	-								Liu-2019			0	0	0
	double bond perfluoroalkyl amines	double bond perfluoroalkyl amines, n=15	dPFAm n=15	C15F30N	763.956	763.956	Negative	M-	1		-	-								Liu-2019			0	0	0
	double bond perfluoroalkyl amine carboxylic acids/carboxyl esters	double bond perfluoroalkyl amine carboxylic acids/carboxyl esters, n=2	dPFAmCACEs n=2	C10F18O2N	507.965	507.965	Negative	M-	1		-	-								Liu-2019			0	0	0
	double bond perfluoroalkyl amine carboxylic acids/carboxyl esters	double bond perfluoroalkyl amine carboxylic acids/carboxyl esters, n=3	dPFAmCACEs n=3	C11F20O2N	557.962	557.962	Negative	M-	1		-	-								Liu-2019			0	0	0
	double bond perfluoroalkyl amine carboxylic acids/carboxyl esters	double bond perfluoroalkyl amine carboxylic acids/carboxyl esters, n=4	dPFAmCACEs n=4	C12F22O2N	607.958	607.958	Negative	M-	1		-	-								Liu-2019			0	0	0
	double bond perfluoroalkyl amine carboxylic acids/carboxyl esters	double bond perfluoroalkyl amine carboxylic acids/carboxyl esters, n=5	dPFAmCACEs n=5	C13F24O2N	657.955	657.955	Negative	M-	1		-	-								Liu-2019			0	0	0
	double bond perfluoroalkyl amine carboxylic acids/carboxyl esters	double bond perfluoroalkyl amine carboxylic acids/carboxyl esters, n=6	dPFAmCACEs n=6	C14F26O2N	707.952	707.952	Negative	M-	1		-	-								Liu-2019			0	0	0
	double bond perfluoroalkyl amine carboxylic acids/carboxyl esters	double bond perfluoroalkyl amine carboxylic acids/carboxyl esters, n=7	dPFAmCACEs n=7	C15F28O2N	757.949	757.949	Negative	M-	1		-	-								Liu-2019			0	0	0
	enol ether-/cyclic ether-/carbonyl-perfluoroalkyl sulfonates	enol ether-/cyclic ether-/carbonyl-perfluoroalkyl sulfonates n=6	eecec PFSA n=6	C6HF11O4S	377.943	376.935	Negative	M-H	1	3.6	-	-						biota	Kyra	Spaan-2020			0	0	0
	enol ether-/cyclic ether-/carbonyl-perfluoroalkyl sulfonates	enol ether-/cyclic ether-/carbonyl-perfluoroalkyl sulfonates n=7	eecec PFSA n=7	C7F13SO4H	427.939	426.932	Negative	M-H	1	4.2	-	-						biota	Kyra	Spaan-2020			0	0	0
	enol ether-/cyclic ether-/carbonyl-perfluoroalkyl sulfonates	enol ether-/cyclic ether-/carbonyl-perfluoroalkyl sulfonates n=8	eecec PFSA n=8	C8F15SO4H	477.936	476.928	Negative	M-H	1	4.8	-	-						biota	Kyra	Spaan-2020			570325	0	2543831	3.82	Spaan-2020
	enol ether-/cyclic ether-/carbonyl-perfluoroalkyl sulfonates	enol ether-/cyclic ether-/carbonyl-perfluoroalkyl sulfonates n=9	eecec PFSA n=9	C9F17SO4H	527.933	526.925	Negative	M-H	1	5.3	-	-						biota	Kyra	Spaan-2020			0	0	0
	enol ether-/cyclic ether-/carbonyl-perfluoroalkyl sulfonates	enol ether-/cyclic ether-/carbonyl-perfluoroalkyl sulfonates n=10	eecec PFSA n=10	C10F19SO4H	577.93	576.922	Negative	M-H	1	5.7	-	-						biota	Kyra	Spaan-2020			0	0	0
	enol ether-/cyclic ether-/carbonyl-perfluoroalkyl sulfonates	enol ether-/cyclic ether-/carbonyl-perfluoroalkyl sulfonates n=11	eecec PFSA n=11	C11F21SO4H	627.927	626.919	Negative	M-H	1	6.1	-	-						biota	Kyra	Spaan-2020			0	0	0
	enol ether-/cyclic ether-/carbonyl-perfluoroalkyl sulfonates	enol ether-/cyclic ether-/carbonyl-perfluoroalkyl sulfonates n=12	eecec PFSA n=12	C12HF23O4S	677.923	676.916	Negative	M-H	1	6.5	-	-						biota	Kyra	Spaan-2020			0	0	0
	enol ether-/cyclic ether-/carbonyl-perfluoroalkyl sulfonates	enol ether-/cyclic ether-/carbonyl-perfluoroalkyl sulfonates n=13	eecec PFSA n=13	C13HF25O4S	727.92	726.912	Negative	M-H	1	6.9	-	-						biota	Kyra	Spaan-2020			0	0	0
	monoether PFSAs	monoether PFSAs n=5	ether PFSA n=5	C5F11SO4H	365.943	364.935	Negative	M-H	1		235.028	-						biota	Kyra	Spaan-2020		In source fragment [C4F9O]−	0	0	0
	monoether PFSAs	monoether PFSAs n=6	ether PFSA n=6	C6F13SO4H	415.939	414.932	Negative	M-H	1		235.028	-						biota	Kyra	Spaan-2020		In source fragment [C4F9O]−	0	304845	0	3.46	Spaan-2020
	monoether PFSAs	monoether PFSAs n=7	ether PFSA n=7	C7F15SO4H	465.936	464.928	Negative	M-H	1		235.028	-						biota	Kyra	Spaan-2020		In source fragment [C4F9O]−	83785	0	257987	3.85	Spaan-2020
	monoether PFSAs	monoether PFSAs n=8	ether PFSA n=8	C8F17SO4H	515.933	514.925	Negative	M-H	1		235.028	-						biota	Kyra	Spaan-2020		In source fragment [C4F9O]−	457733	0	1718750	4.25	Spaan-2020
	monoether PFSAs	monoether PFSAs n=9	ether PFSA n=9*	C9F19SO4H	565.93	564.922	Negative	M-H	1		235.028	77.965						biota	Kyra	Spaan-2020		In source fragment [C4F9O]−	43997.3	0	733390	4.51	Spaan-2020
	monoether PFSAs	monoether PFSAs n=10	ether PFSA n=10	C10F21SO4H	615.927	614.919	Negative	M-H	1		235.028	-						biota	Kyra	Spaan-2020		In source fragment [C4F9O]−	0	0	0
	multiple ether-substituted Perfluoroalkyl (linear) sulfonic acids	multiple ether-substituted Perfluoroalkyl (linear) sulfonic acids, n=2	mOPFLSA n=2	C6HF13O5S	431.934	430.926	Negative	M-H	1		-	-				FC(F)(F)C(F)(F)OC(F)(F)C(F)(F)OC(F)(F)C(F)(F)S(=O)(O)=O				Liu-2019			0	0	0
	multiple ether-substituted Perfluoroalkyl (linear) sulfonic acids	multiple ether-substituted Perfluoroalkyl (linear) sulfonic acids, n=3	mOPFLSA n=3	C7HF15O5S	481.931	480.923	Negative	M-H	1		-	-				FC(F)(F)C(F)(F)OC(F)(F)C(F)(F)OC(F)(F)C(F)(F)C(F)(F)S(=O)(O)=O				Liu-2019			54582.3	0	1276378	3.92	Liu-2019
	multiple ether-substituted Perfluoroalkyl (linear) sulfonic acids	multiple ether-substituted Perfluoroalkyl (linear) sulfonic acids, n=4	mOPFLSA n=4	C8HF17O5S	531.928	530.92	Negative	M-H	1		-	-				FC(F)(F)C(F)(F)OC(F)(F)C(F)(F)OC(F)(F)C(F)(F)C(F)(F)C(F)(F)S(=O)(O)=O				Liu-2019			0	0	0
	multiple ether-substituted Perfluoroalkyl (linear) sulfonic acids	multiple ether-substituted Perfluoroalkyl (linear) sulfonic acids, n=5	mOPFLSA n=5	C9HF19O5S	581.925	580.917	Negative	M-H	1		-	-				FC(F)(F)C(F)(F)OC(F)(F)C(F)(F)OC(F)(F)C(F)(F)C(F)(F)C(F)(F)C(F)(F)S(=O)(O)=O				Liu-2019			0	0	0
	multiple ether-substituted Perfluoroalkyl (linear) sulfonic acids	multiple ether-substituted Perfluoroalkyl (linear) sulfonic acids, n=6	mOPFLSA n=6	C10HF21O5S	631.921	630.914	Negative	M-H	1		-	-				FC(F)(F)C(F)(F)OC(F)(F)C(F)(F)OC(F)(F)C(F)(F)C(F)(F)C(F)(F)C(F)(F)C(F)(F)S(=O)(O)=O				Liu-2019			0	0	0
	multiple ether-substituted Perfluoroalkyl (linear) sulfonic acids	multiple ether-substituted Perfluoroalkyl (linear) sulfonic acids, n=7	mOPFLSA n=7	C11HF23O5S	681.918	680.91	Negative	M-H	1		-	-				FC(F)(F)C(F)(F)OC(F)(F)C(F)(F)OC(F)(F)C(F)(F)C(F)(F)C(F)(F)C(F)(F)C(F)(F)C(F)(F)S(=O)(O)=O				Liu-2019			0	0	0
	multiple ether-substituted Perfluoroalkyl (linear) sulfonic acids	multiple ether-substituted Perfluoroalkyl (linear) sulfonic acids, n=8	mOPFLSA n=8	C12HF25O5S	731.915	730.907	Negative	M-H	1		-	-				FC(F)(F)C(F)(F)OC(F)(F)C(F)(F)OC(F)(F)C(F)(F)C(F)(F)C(F)(F)C(F)(F)C(F)(F)C(F)(F)C(F)(F)S(=O)(O)=O				Liu-2019			0	0	0
	perfluoroalkyl amines	perfluoroalkyl amines, n=5	PFAm n=5	C5F12N	301.984	301.984	Negative	M-	1		-	-								Liu-2019			0	0	0
	perfluoroalkyl amines	perfluoroalkyl amines, n=6	PFAm n=6	C6F14N	351.981	351.981	Negative	M-	1		-	-								Liu-2019			0	0	0
	perfluoroalkyl amines	perfluoroalkyl amines, n=7	PFAm n=7	C7F16N	401.978	401.978	Negative	M-	1		-	-								Liu-2019			0	0	0
	perfluoroalkyl amines	perfluoroalkyl amines, n=8	PFAm n=8	C8F18N	451.975	451.975	Negative	M-	1		-	-								Liu-2019			0	0	0
	perfluoroalkyl amines	perfluoroalkyl amines, n=9	PFAm n=9	C9F20N	501.972	501.972	Negative	M-	1		-	-								Liu-2019			0	0	0
	perfluoroalkyl amines	perfluoroalkyl amines, n=10	PFAm n=10	C10F22N	551.968	551.968	Negative	M-	1		-	-								Liu-2019			0	0	0
	perfluoroalkyl amines	perfluoroalkyl amines, n=11	PFAm n=11	C11F24N	601.965	601.965	Negative	M-	1		-	-								Liu-2019			0	0	0
	perfluoroalkyl amines	perfluoroalkyl amines, n=12	PFAm n=12	C12F26N	651.962	651.962	Negative	M-	1		-	-								Liu-2019			0	0	0
	perfluoroalkyl amine carboxylic acids/carboxyl esters	perfluoroalkyl amine carboxylic acids/carboxyl esters, n=9	PFAmCACEs n=9	C9F18O2N	495.965	495.965	Negative	M-	1		-	-								Liu-2019			0	0	0
	perfluoroalkyl amine carboxylic acids/carboxyl esters	perfluoroalkyl amine carboxylic acids/carboxyl esters, n=10	PFAmCACEs n=10	C10F20O2N	545.962	545.962	Negative	M-	1		-	-								Liu-2019			0	0	0
	perfluoroalkyl amine carboxylic acids/carboxyl esters	perfluoroalkyl amine carboxylic acids/carboxyl esters, n=11	PFAmCACEs n=11	C11F22O2N	595.958	595.958	Negative	M-	1		-	-								Liu-2019			0	0	0
	perfluoroalkyl amine carboxylic acids/carboxyl esters	perfluoroalkyl amine carboxylic acids/carboxyl esters, n=12	PFAmCACEs n=12	C12F24O2N	645.955	645.955	Negative	M-	1		-	-								Liu-2019			0	0	0
	perfluoroalkyl amine carboxylic acids/carboxyl esters	perfluoroalkyl amine carboxylic acids/carboxyl esters, n=13	PFAmCACEs n=13	C13F26O2N	695.952	695.952	Negative	M-	1		-	-								Liu-2019			0	0	0
	perfluoroalkyl amine carboxylic acids/carboxyl esters	perfluoroalkyl amine carboxylic acids/carboxyl esters, n=14	PFAmCACEs n=14	C14F28O2N	745.949	745.949	Negative	M-	1		-	-								Liu-2019			0	0	0
	perfluoroalkyl amine carboxylic acids/carboxyl esters	perfluoroalkyl amine carboxylic acids/carboxyl esters, n=15	PFAmCACEs n=15	C15F30O2N	795.946	795.946	Negative	M-	1		-	-								Liu-2019			0	0	0
	perfluoroalkyl amine carboxylic acids/carboxyl esters	perfluoroalkyl amine carboxylic acids/carboxyl esters, n=16	PFAmCACEs n=16	C16F32O2N	845.942	845.942	Negative	M-	1		-	-								Liu-2019			0	0	0
	perfluoroalkyl amine carboxyl esters	perfluoroalkyl amine carboxyl esters, n=1	PFAmCEs n=1	C13H6F20O6N	651.988	651.988	Negative	M-	1		-	-								Liu-2019			0	0	0
	perfluoroalkyl amine carboxyl esters	perfluoroalkyl amine carboxyl esters, n=2	PFAmCEs n=2	C14H6F22O6N	701.985	701.985	Negative	M-	1		-	-								Liu-2019			0	0	0
	perfluoroalkyl amine carboxyl esters	perfluoroalkyl amine carboxyl esters, n=3	PFAmCEs n=3	C15H6F24O6N	751.982	751.982	Negative	M-	1		-	-								Liu-2019			0	0	0
	perfluoroalkyl amine carboxyl esters	perfluoroalkyl amine carboxyl esters, n=4	PFAmCEs n=4	C16H6F26O6N	801.979	801.979	Negative	M-	1		-	-								Liu-2019			0	0	0
	perfluoroalkyl amine carboxyl esters	perfluoroalkyl amine carboxyl esters, n=5	PFAmCEs n=5	C20H6F28O6N	887.975	887.975	Negative	M-	1		-	-								Liu-2019			0	0	0
	perfluoroalkyl amine carboxyl esters	perfluoroalkyl amine carboxyl esters, n=6	PFAmCEs n=6	C18H6F30O6N	901.972	901.972	Negative	M-	1		-	-								Liu-2019			0	0	0
	perfluoroalkyl amine carboxyl esters_i	perfluoroalkyl amine carboxyl esters_i, n=0	PFAmCEs_i n=0	C10H2F18O5N	557.965	557.965	Negative	M-	1		-									Liu-2019			0	0	0
	perfluoroalkyl amine carboxyl esters_i	perfluoroalkyl amine carboxyl esters_i, n=1	PFAmCEs_i n=1	C11H2F20O5N	607.962	607.962	Negative	M-	1		-									Liu-2019			0	0	0
	perfluoroalkyl amine carboxyl esters_i	perfluoroalkyl amine carboxyl esters_i, n=2	PFAmCEs_i n=2	C12H2F22O5N	657.959	657.959	Negative	M-	1		-									Liu-2019			0	0	0
	perfluoroalkyl amine carboxyl esters_i	perfluoroalkyl amine carboxyl esters_i, n=3	PFAmCEs_i n=3	C13H2F24O5N	707.956	707.956	Negative	M-	1		-									Liu-2019			0	0	0
	perfluoroalkyl amine carboxyl esters_i	perfluoroalkyl amine carboxyl esters_i, n=4	PFAmCEs_i n=4	C14H2F26O5N	757.952	757.952	Negative	M-	1		-									Liu-2019			0	0	0
	perfluoroalkyl amine carboxyl esters_i	perfluoroalkyl amine carboxyl esters_i, n=5	PFAmCEs_i n=5	C15H2F28O5N	807.949	807.949	Negative	M-	1		-									Liu-2019			0	0	0
	perfluoroalkyl amine carboxyl esters_i	perfluoroalkyl amine carboxyl esters_i, n=6	PFAmCEs_i n=6	C16H2F30O5N	857.946	857.946	Negative	M-	1		-									Liu-2019			0	0	0
	perfluoroalkyl amine carboxyl esters_i	perfluoroalkyl amine carboxyl esters_i, n=7	PFAmCEs_i n=7	C17H2F32O5N	907.943	907.943	Negative	M-	1		-									Liu-2019			0	0	0
	perfluoroether carboxylic acid	perfluoroether carboxylic acid	PFECA n=7	C7F13O3H	379.972	378.965	Negative	M-H	1	3.7	-	-						biota	Kyra	Spaan-2020			0	0	0
	perfluoroether carboxylic acid		PFECA n=8	C8F15O3H	429.969	428.961	Negative	M-H	1	4.2	-	-						biota	Kyra	Spaan-2020			0	0	0
	perfluoroether carboxylic acid		PFECA n=9	C9F17O3H	479.966	478.958	Negative	M-H	1	4.7	-	-						biota	Kyra	Spaan-2020			0	0	42177.3	3.8	Spaan-2020
	perfluoroether carboxylic acid		PFECA n=10	C10F19O3H	529.963	528.955	Negative	M-H	1	5.1	-	-						biota	Kyra	Spaan-2020			0	0	0
	perfluoroether carboxylic acid		PFECA n=11	C11F21O3H	579.96	578.952	Negative	M-H	1	5.6	-	-						biota	Kyra	Spaan-2020			0	0	0
	perfluoroether carboxylic acid		PFECA n=12	C12F23O3H	629.956	628.949	Negative	M-H	1	6.1	-	-						biota	Kyra	Spaan-2020			0	0	0
	Perfluoroalkyl N-heterocycles	Perfluoroalkyl N-heterocycles, m+n+p=6	PFNhcs m+n+p=6	C9F15N2O	436.978	436.978	Negative	M-	1		-	-				FC(F)(F)C1=C(OC(F)(F)F)N=C(C(F)(C(F)(F)F)C(F)(F)C(F)(F)F)[N-]1				Liu-2019			0	0	0
	Perfluoroalkyl N-heterocycles	Perfluoroalkyl N-heterocycles, m+n+p=7	PFNhcs m+n+p=7	C10F17N2O	486.974	486.974	Negative	M-	1		-	-								Liu-2019			0	0	0
	Perfluoroalkyl N-heterocycles	Perfluoroalkyl N-heterocycles, m+n+p=8	PFNhcs m+n+p=8	C11F19N2O	536.971	536.971	Negative	M-	1		-	-								Liu-2019			0	0	0
	Perfluoroalkyl N-heterocycles	Perfluoroalkyl N-heterocycles, m+n+p=9	PFNhcs m+n+p=9	C12F21N2O	586.968	586.968	Negative	M-	1		-	-								Liu-2019			0	0	0
	Perfluoroalkyl N-heterocycles	Perfluoroalkyl N-heterocycles, m+n+p=10	PFNhcs m+n+p=10	C13F23N2O	636.965	636.965	Negative	M-	1		-	-								Liu-2019			0	0	0
	Perfluoroalkyl N-heterocycles	Perfluoroalkyl N-heterocycles, m+n+p=11	PFNhcs m+n+p=11	C14F25N2O	686.962	686.962	Negative	M-	1		-	-								Liu-2019			0	0	0
	Perfluoroalkyl N-heterocycles	Perfluoroalkyl N-heterocycles, m+n+p=12	PFNhcs m+n+p=12	C15F27N2O	736.958	736.958	Negative	M-	1		-	-								Liu-2019			0	0	0
	Perfluoroalkyl N-heterocycles	Perfluoroalkyl N-heterocycles, m+n+p=13	PFNhcs m+n+p=13	C16F29N2O	786.955	786.955	Negative	M-	1		-	-								Liu-2019			0	0	0
	Perfluoroalkyl N-heterocycles	Perfluoroalkyl N-heterocycles, m+n+p=14	PFNhcs m+n+p=14	C17F31N2O	836.952	836.952	Negative	M-	1		-	-								Liu-2019			0	0	320619	5.48	Liu-2019	217.97 [C5F6N2O]-
	perfluoroalkyl carboxylates	PFCAs n=6	PFHxA	C6F11O2H	313.981	312.973	Negative	M-H	1	2.7	-	-			x			biota	Kyra	Spaan-2020			0	0	0
	perfluoroalkyl carboxylates	PFCAs n=7	PFHpA	C7F13O2H	363.977	362.97	Negative	M-H	1	3.4	-	-			x			biota	Kyra	Spaan-2020			0	0	6292.56	2.79
	perfluoroalkyl carboxylates	PFCAs n=8	PFOA	C8F15O2H	413.974	412.966	Negative	M-H	1	4	-	-			x			biota	Kyra	Spaan-2020			1933203	334278	2.58372e+06	3.24		168.99 [C3F7]-
	perfluoroalkyl carboxylates	PFCAs n=9	PFNA	C9F17O2H	463.971	462.963	Negative	M-H	1	4.6	-	-			x			biota	Kyra	Spaan-2020			5.99357e+07	1.73245e+07	8.34782e+07	3.65		168.99 [C3F7]-	218.99 [C4F9]-
	perfluoroalkyl carboxylates	PFCAs n=10	PFDA	C10F19O2H	513.968	512.96	Negative	M-H	1	5	-	-			x			biota	Kyra	Spaan-2020			22872243	1.08877e+07	46142698	4.03		168.99 [C3F7]-
	perfluoroalkyl carboxylates	PFCAs n=11	PFUnDA	C11F21O2H	563.965	562.957	Negative	M-H	1	5.5	-	-			x			biota	Kyra	Spaan-2020			38636165	1.54881e+07	8.36463e+07	4.38		168.99 [C3F7]-	118.99 [C2F5]-
	perfluoroalkyl carboxylates	PFCAs n=12	PFDoDA	C12F23O2H	613.961	612.954	Negative	M-H	1	5.9	-	-			x			biota	Kyra	Spaan-2020			13511632	5.73362e+06	33277148	4.72		168.99 [C3F7]-	118.99 [C2F5]-
	perfluoroalkyl carboxylates	PFCAs n=13	PFTrDA	C13F25O2H	663.958	662.95	Negative	M-H	1	6.3	-	-			x			biota	Kyra	Spaan-2020			3.36526e+07	1.64256e+07	4.59214e+07	5.05		168.99 [C3F7]-	118.99 [C2F5]-
	perfluoroalkyl carboxylates	PFCAs n=14	PFTeDA	C14F27O2H	713.955	712.947	Negative	M-H	1	6.7	-	-			x			biota	Kyra	Spaan-2020			4.90544e+06	2628806	9.18772e+06	5.36		168.99 [C3F7]-
	perfluoroalkyl carboxylates	PFCAs n=15	PFPeDA	C15F29O2H	763.952	762.944	Negative	M-H	1	7.1	-	-						biota	Kyra	Spaan-2020			2281666	1.46949e+06	3.50202e+06	5.64		168.99 [C3F7]-
	perfluoroalkyl carboxylates	PFCAs n=16	PFHxDA	C16F31O2H	813.949	812.941	Negative	M-H	1	8.1	-	-			x			biota	Kyra	Spaan-2020			0	0	0
	perfluoroalkyl sulfonates	PFSAs n=4	PFBS	C4F9SO3H	299.951	298.943	Negative	M-H	1	2.5	-	-			x			biota	Kyra	Spaan-2020			0	0	0
	perfluoroalkyl sulfonates	PFSAs n=5	PFPeS	C5F11SO3H	349.948	348.94	Negative	M-H	1	3.3	-	-						biota	Kyra	Spaan-2020			0	0	0
	perfluoroalkyl sulfonates	PFSAs n=6	PFHxS	C6F13SO3H	399.944	398.937	Negative	M-H	1	4.1	-	-			x			biota	Kyra	Spaan-2020			9.09777e+06	4.28623e+06	1.83914e+07	3.27
	perfluoroalkyl sulfonates	PFSAs n=7	PFHpS	C7F15SO3H	449.941	448.933	Negative	M-H	1	4.6	-	-						biota	Kyra	Spaan-2020			15312159	2825564	44781947	3.71		79.96 [SO3]-	98.96 [FSO3]-
	perfluoroalkyl sulfonates	PFSAs n=8	PFOS	C8F17SO3H	499.938	498.93	Negative	M-H	1	5.1	-	-			x			biota	Kyra	Spaan-2020			1.28685e+09	7.53304e+08	1.60338e+09	4.1		79.96 [SO3]-
	perfluoroalkyl sulfonates	PFSAs n=9	PFNS	C9F19SO3H	549.935	548.927	Negative	M-H	1	5.4	-	-						biota	Kyra	Spaan-2020			830529	169366	3.06697e+06	4.47
	perfluoroalkyl sulfonates	PFSAs n=10	PFDS	C10F21SO3H	599.932	598.924	Negative	M-H	1	5.8	-	-			x			biota	Kyra	Spaan-2020			545328	63984.1	5.94021e+06	4.8
	perfluoroalkyl sulfonamides	FASAs n=4	FBSA	C4H2F9NO2S	298.967	297.959	Negative	M-H	1	3.5	77.965	-						biota	Kyra	Spaan-2020, Barrett-2021, Wang-2021	Jon		442448	677565	614814	3.32	Spaan-2020, Barrett-2021, Wang-2021
	perfluoroalkyl sulfonamides	FASAs n=5	FPeSA	C5H2F11NO2S	348.964	347.956	Negative	M-H	1	4.5	77.965	-						biota	Kyra	Spaan-2020, Wang-2021			0	0	75817.5	3.99	Spaan-2020, Wang-2021
	perfluoroalkyl sulfonamides	FASAs n=6	FHxSA	C6H2F13NO2S	398.96	397.953	Negative	M-H	1	5.2	77.965	-						biota	Kyra	Spaan-2020, Wang-2021			0	0	53876.3	4.52	Spaan-2020, Wang-2021
	perfluoroalkyl sulfonamides	FASAs n=7	FHpSA	C7H2F15NO2S	448.957	447.949	Negative	M-H	1	5.8	77.965	-						biota	Kyra	Spaan-2020, Wang-2021			0	0	0
	perfluoroalkyl sulfonamides	FASAs n=8	FOSA	C8H2F17NO2S	498.954	497.946	Negative	M-H	1	6.4	77.965	-			x			biota	Kyra	Spaan-2020, Wang-2021			1.04157e+06	330760	1129914	5.44
	perfluoroalkyl sulfonamides	FASAs n=9	FNSA	C9H2F19NO2S	548.951	547.943	Negative	M-H	1	7	77.965	-						biota	Kyra	Spaan-2020			0	0	0
	perfluoroalkyl sulfonamides	FASAs n=10	FDSA	C10H2F21NO2S	598.948	597.94	Negative	M-H	1	7.6	77.965	-						biota	Kyra	Spaan-2020			0	0	0
	perfluorooctane sulfonamidoacetate	FOSAA	FOSAA	C10H5F17NO4S	558.19	557.183	Negative	M-H	1	4.9	-	77.965			x			biota	Kyra	Spaan-2020			0	0	0
	H-PFCAs / in-source fragment PFCA?	H-PFCAs / in-source fragment PFCA? n=4	H-PFBA	C4F6H2O2	195.996	194.988	Negative	M-H	1									in-source fragment ?!	Kyra				0	0	0
	H-PFCAs / in-source fragment PFCA?	H-PFCAs / in-source fragment PFCA? n=5	H-PFPeA	C5F8H2O2	245.993	244.985	Negative	M-H	1									in-source fragment ?!	Kyra				0	0	0
	H-PFCAs / in-source fragment PFCA?	H-PFCAs / in-source fragment PFCA? n=6	H-PFHxA	C6F10H2O2	295.99	294.982	Negative	M-H	1									in-source fragment ?!	Kyra				0	0	0
	H-PFCAs / in-source fragment PFCA?	H-PFCAs / in-source fragment PFCA? n=7	H-PFHpA	C7F12H2O2	345.986	344.979	Negative	M-H	1		280.983							in-source fragment ?!	Kyra	Barrett-2021 (fragment)	Melanie		0	0	0
	H-PFCAs / in-source fragment PFCA?	H-PFCAs / in-source fragment PFCA? n=8	H-PFOA	C8F14H2O2	395.983	394.975	Negative	M-H	1									in-source fragment ?!	Kyra				159490	122015	72837.4	2.72
	H-PFCAs / in-source fragment PFCA?	H-PFCAs / in-source fragment PFCA? n=9	H-PFNA	C9F16H2O2	445.98	444.972	Negative	M-H	1		380.976	318.98	168.989					in-source fragment ?!	Kyra	Barrett-2021 (fragment)	Melanie		481328	217145	193217	3.14	Barrett-2021 (fragment)
	H-PFCAs / in-source fragment PFCA?	H-PFCAs / in-source fragment PFCA? n=10	H-PFDA	C10F18H2O2	495.977	494.969	Negative	M-H	1									in-source fragment ?!	Kyra				600221	214692	248890	3.52
	H-PFCAs / in-source fragment PFCA?	H-PFCAs / in-source fragment PFCA? n=11	H-PFUnDA	C11F20H2O2	545.973	544.966	Negative	M-H	1									in-source fragment ?!	Kyra				411908	279760	209111	3.85
	H-PFCAs / in-source fragment PFCA?	H-PFCAs / in-source fragment PFCA? n=12	H-PFDoDA	C12F22H2O2	595.971	594.963	Negative	M-H	1		530.966							in-source fragment ?!	Kyra	Barrett-2021 (fragment)	Melanie		103747	17668.1	135858	4.2	Barrett-2021 (fragment)
	H-Sulfonamides	H-Sulfonamides, n=8	H-FOSA	C8H2F16NO2S	480.963	479.955	Negative	M-H	1	5.8	77.965									Barrett-2021	Jon B		0	0	0
	H-Sulfonamides	H-Sulfonamides, n=10	H-FDSA	C10H2F20NO2S	580.956	579.949	Negative	M-H	1	6.36	168.989									Barrett-2021	Jon B		0	0	0
	H-PFSAs	H-PFSAs, n=8	H-PFOS	C8H2F16O3S	481.947	480.939	Negative	M-H	1	5.75	397.952	460.933								Barrett-2021	Jon B		774940	0	1.23366e+06	3.89	Barrett-2021
	H-PFSAs	H-PFSAs, n=10	H-PFDS	C10H2F20O3S	581.941	580.933	Negative	M-H	1	5.89	498.93									Barrett-2021	Jon B		0	0	102074	4.09	Barrett-2021
