# Supplementary material for: Per- and polyfluoroalkyl substances (PFAS) in white-tailed sea eagle eggs from Sweden: temporal trends (1969–2021), spatial variations, fluorine mass balance, and suspect screening
Source: Royal Society of Chemistry journal article supplement (doi:10.1039/d3em00141e), 2023-01-01
Supplement: d3em00141e3.xlsx [file d3em00141e3.xlsx]

## Sheet: PFAS concentrations
Table S1. PFAS concentrations in individual samples, before LOQ replacement, after LOQ replacement, and after desication index (DI) correction.											Concentrations in ng/g with <LOQ values															Concentrations in ng/g with LOQ replaced as LOQ/sqrt(2)															DI corrected Concentrations in ng/g
year	DI_chk	coll_year	region	county	municipality	acc_year	Area	M_F	header	LABKODIP	PFHxA	PFHpA	L-PFOA	PFNA	PFDA	PFUnDA	PFDoDA	PFTriDA	PFTeDA	PFPeDA	PFBS	L-PFHxS	L-PFOS	L-PFDS	L-FOSA	PFHXA	PFHPA	PFOA	PFNA	PFDA	PFUNDA	PFDODA	PFTRDA	PFTEDA	PFPEDA	PFBS	PFHXS	PFOS	PFDS	FOSA	DI_PFHXA	DI_PFHPA	DI_PFOA	DI_PFNA	DI_PFDA	DI_PFUNDA	DI_PFDODA	DI_PFTRDA	DI_PFTEDA
1969	0.683304	1969	Ostkusten	C	Östhammar	1969	GB	MAR	C1969/07018	11x/193	<LOQ	<LOQ	<LOQ	<LOQ	0.072	0.172	0.055	0.15	<LOQ	<LOQ	<LOQ	<LOQ	9.238	<LOQ	0.028	0.190919	0.190919	0.226274	0.13435	0.072	0.172	0.055	0.15	0.0282843	0.00707107	0.120208	0.346482	9.238	0.0212132	0.028	0.130456	0.130456	0.154614	0.091802	0.0491979	0.117528	0.0375817	0.102496	0.0193267
1970	0.291826	1970	Ostkusten	C	Östhammar	1970	GB	MAR	C1970/07012	11x/188	<LOQ	<LOQ	<LOQ	0.416	0.261	0.607	0.36	0.886	0.16	0.121	<LOQ	<LOQ	67.91	<LOQ	0.133	0.190919	0.190919	0.226274	0.416	0.261	0.607	0.36	0.886	0.16	0.121	0.120208	0.346482	67.91	0.0212132	0.133	0.055715	0.055715	0.0660326	0.121399	0.0761665	0.177138	0.105057	0.258558	0.0466921
1970	0.168	1970	Ostkusten	D	Trosa	1970	BP	MAR	C1970/07013	11x/191	<LOQ	<LOQ	<LOQ	0.34	0.155	0.376	0.229	0.791	0.228	0.098	<LOQ	0.643	63.047	0.047	0.233	0.190919	0.190919	0.226274	0.34	0.155	0.376	0.229	0.791	0.228	0.098	0.120208	0.643	63.047	0.047	0.233	0.0320744	0.0320744	0.0380142	0.0571202	0.0260401	0.0631682	0.0384721	0.132888	0.0383041
1971	0.435823	1971	Ostkusten	C	Östhammar	1971	GB	MAR	C1971/07050	11x/194	<LOQ	<LOQ	<LOQ	0.341	0.247	0.523	0.249	0.378	0.066	0.046	<LOQ	<LOQ	57.881	0.083	0.396	0.190919	0.190919	0.226274	0.341	0.247	0.523	0.249	0.378	0.066	0.046	0.120208	0.346482	57.881	0.083	0.396	0.0832069	0.0832069	0.0986156	0.148616	0.107648	0.227936	0.10852	0.164741	0.0287643
1973	0.386985	1973	Ostkusten	AB	Södertälje	1973	BP	MAR	C1973/07065	11x/082	<LOQ	<LOQ	0.823	0.222	<LOQ	0.152	0.056	0.739	0.157	0.023	<LOQ	0.846	87.58	0.044	0.066	0.190919	0.190919	0.823	0.222	0.13435	0.152	0.056	0.739	0.157	0.023	0.120208	0.846	87.58	0.044	0.066	0.0738826	0.0738826	0.318488	0.0859106	0.0519915	0.0588216	0.0216711	0.285982	0.0607566
1975	0.751488	1975	Ostkusten	C	Tierp	1975	GB	MAR	C1975/07077	11x/080	<LOQ	<LOQ	<LOQ	<LOQ	0.144	0.285	0.08	0.614	0.128	0.282	<LOQ	3.066	14.028	<LOQ	0.018	0.190919	0.190919	0.226274	0.13435	0.144	0.285	0.08	0.614	0.128	0.282	0.120208	3.066	14.028	0.0212132	0.018	0.143473	0.143473	0.170042	0.100963	0.108214	0.214174	0.0601191	0.461414	0.0961905
1975	0.552034	1975	Ostkusten	X	Söderhamn	1975	GB	MAR	C1975/07078	11x/090	<LOQ	<LOQ	<LOQ	0.352	0.257	0.524	0.193	0.454	0.107	0.013	<LOQ	<LOQ	19.903	<LOQ	0.066	0.190919	0.190919	0.226274	0.352	0.257	0.524	0.193	0.454	0.107	0.013	0.120208	0.346482	19.903	0.0212132	0.066	0.105394	0.105394	0.124911	0.194316	0.141873	0.289266	0.106542	0.250623	0.0590676
1976	0.657366	1976	Ostkusten	C	Östhammar	1976	GB	MAR	C1976/07092	11x/189	<LOQ	<LOQ	<LOQ	0.224	0.147	0.324	0.14	0.283	0.097	0.024	<LOQ	<LOQ	23.862	<LOQ	0.053	0.190919	0.190919	0.226274	0.224	0.147	0.324	0.14	0.283	0.097	0.024	0.120208	0.346482	23.862	0.0212132	0.053	0.125504	0.125504	0.148745	0.14725	0.0966328	0.212987	0.0920312	0.186035	0.0637645
1979	0.280386	1979	Ostkusten	AB	Haninge	1979	BP	MAR	C1979/07001	11x/106	<LOQ	<LOQ	2.019	13.351	3.391	5.845	1.993	9.384	1.935	0.932	<LOQ	3.797	584.474	0.22	1.296	0.190919	0.190919	2.019	13.351	3.391	5.845	1.993	9.384	1.935	0.932	0.120208	3.797	584.474	0.22	1.296	0.0535309	0.0535309	0.566099	3.74343	0.950788	1.63885	0.558809	2.63114	0.542546
1980	0.776337	1980	Inland N	BD	Jokkmokk	1980	LP	LIM	C1980/07009	11x/099	<LOQ	<LOQ	<LOQ	0.801	0.396	0.581	0.137	0.15	<LOQ	<LOQ	<LOQ	<LOQ	14.249	<LOQ	0.013	0.190919	0.190919	0.226274	0.801	0.396	0.581	0.137	0.15	0.0282843	0.00707107	0.120208	0.346482	14.249	0.0212132	0.013	0.148217	0.148217	0.175665	0.621846	0.307429	0.451052	0.106358	0.11645	0.0219581
1980	0.565963	1980	Ostkusten	AB	Värmdö	1980	BP	MAR	C1980/07014	11x/105	<LOQ	<LOQ	0.836	2.9	0.849	1.402	0.564	1.785	0.236	0.111	<LOQ	2.108	289.845	0.363	0.346	0.190919	0.190919	0.836	2.9	0.849	1.402	0.564	1.785	0.236	0.111	0.120208	2.108	289.845	0.363	0.346	0.108053	0.108053	0.473145	1.64129	0.480502	0.793479	0.319203	1.01024	0.133567
1980	0.838865	1980	Ostkusten	D	Nyköping	1980	BP	MAR	C1980/07003	11x/103	<LOQ	<LOQ	<LOQ	1.225	0.397	0.811	0.306	0.638	0.182	0.085	<LOQ	0.674	90.206	<LOQ	0.477	0.190919	0.190919	0.226274	1.225	0.397	0.811	0.306	0.638	0.182	0.085	0.120208	0.674	90.206	0.0212132	0.477	0.160155	0.160155	0.189813	1.02761	0.333029	0.680319	0.256693	0.535196	0.152673
1981	0.542634	1981	Ostkusten	C	Östhammar	1981	GB	MAR	C1981/07075	11x/110	<LOQ	<LOQ	0.576	2	0.741	1.213	0.388	0.941	0.094	0.05	<LOQ	<LOQ	68.939	<LOQ	0.479	0.190919	0.190919	0.576	2	0.741	1.213	0.388	0.941	0.094	0.05	0.120208	0.346482	68.939	0.0212132	0.479	0.103599	0.103599	0.312557	1.08527	0.402091	0.658215	0.210542	0.510618	0.0510076
1984	0.193695	1984	Ostkusten	X	Gävle	1984	GB	MAR	C1984/07037	11x/115	<LOQ	<LOQ	1.76	17.439	6.284	11.586	3.32	9.542	1.385	0.513	<LOQ	1.17	460.013	3.472	2.289	0.190919	0.190919	1.76	17.439	6.284	11.586	3.32	9.542	1.385	0.513	0.120208	1.17	460.013	3.472	2.289	0.03698	0.03698	0.340903	3.37785	1.21718	2.24415	0.643067	1.84824	0.268267
1986	0.358556	1986	Inland S-M	C	Uppsala	1986	IN	LIM	C1986/07050	11x/085	<LOQ	<LOQ	0.93	4.764	1.971	3.798	1.005	3.098	0.55	0.184	<LOQ	0.524	90.25	0.43	0.339	0.190919	0.190919	0.93	4.764	1.971	3.798	1.005	3.098	0.55	0.184	0.120208	0.524	90.25	0.43	0.339	0.0684552	0.0684552	0.333457	1.70816	0.706715	1.3618	0.360349	1.11081	0.197206
1987	0.462184	1987	Ostkusten	D	Nyköping	1987	BP	MAR	C1987/07044	11x/081	<LOQ	<LOQ	0.402	4.66	0.98	2.281	0.791	2.662	0.636	0.23	<LOQ	2.728	232.385	0.981	0.275	0.190919	0.190919	0.402	4.66	0.98	2.281	0.791	2.662	0.636	0.23	0.120208	2.728	232.385	0.981	0.275	0.0882396	0.0882396	0.185798	2.15378	0.45294	1.05424	0.365588	1.23033	0.293949
1987	0.157922	1987	Ostkusten	X	Gävle	1987	GB	MAR	C1987/07060	11x/084	2.383	<LOQ	2.19	21.109	10.535	20.413	7.259	59.974	11.223	3.495	<LOQ	10.29	946.991	6.861	1.169	2.383	0.190919	2.19	21.109	10.535	20.413	7.259	59.974	11.223	3.495	0.120208	10.29	946.991	6.861	1.169	0.376327	0.0301502	0.345849	3.33357	1.66371	3.22366	1.14635	9.4712	1.77236
1988	0.849504	1988	Ostkusten	C	Östhammar	1988	GB	MAR	C1988/07150	11x/088	<LOQ	<LOQ	0.352	2.481	1.233	2.836	0.84	2.615	0.447	0.145	<LOQ	0.557	73.631	0.371	0.05	0.190919	0.190919	0.352	2.481	1.233	2.836	0.84	2.615	0.447	0.145	0.120208	0.557	73.631	0.371	0.05	0.162186	0.162186	0.299025	2.10762	1.04744	2.40919	0.713583	2.22145	0.379728
1988	0.856155	1988	Inland N	BD	Kiruna	1988	LP	LIM	C1988/07160	11x/083	<LOQ	<LOQ	<LOQ	0.94	0.527	1.871	0.34	1.048	0.167	0.065	<LOQ	<LOQ	24.566	0.045	0.43	0.190919	0.190919	0.226274	0.94	0.527	1.871	0.34	1.048	0.167	0.065	0.120208	0.346482	24.566	0.045	0.43	0.163456	0.163456	0.193726	0.804786	0.451194	1.60187	0.291093	0.89725	0.142978
1989	0.826787	1989	Ostkusten	C	Östhammar	1989	GB	MAR	C1989/07032	11x187	<LOQ	<LOQ	1.09	5.885	2.207	5.093	1.401	3.168	0.275	0.177	<LOQ	<LOQ	94.677	0.34	0.179	0.190919	0.190919	1.09	5.885	2.207	5.093	1.401	3.168	0.275	0.177	0.120208	0.346482	94.677	0.34	0.179	0.157849	0.157849	0.901197	4.86564	1.82472	4.21082	1.15833	2.61926	0.227366
1989	0.344318	1989	Inland S-M	E	Linköping	1989	IN	LIM	C1989/07030	11x/089	<LOQ	<LOQ	<LOQ	1.977	2.651	3.793	1.337	5.173	0.788	0.447	<LOQ	1.136	884.48	3.299	0.77	0.190919	0.190919	0.226274	1.977	2.651	3.793	1.337	5.173	0.788	0.447	0.120208	1.136	884.48	3.299	0.77	0.0657368	0.0657368	0.0779103	0.680717	0.912787	1.306	0.460353	1.78116	0.271323
1992	0.408856	1992	Ostkusten	X	Gävle	1992	GB	MAR	C1992/07062	11x/078	<LOQ	<LOQ	0.333	6.946	5.426	15.171	4.681	13.672	1.741	0.697	<LOQ	0.602	281.427	1.198	1.045	0.190919	0.190919	0.333	6.946	5.426	15.171	4.681	13.672	1.741	0.697	0.120208	0.602	281.427	1.198	1.045	0.0780584	0.0780584	0.136149	2.83992	2.21845	6.20276	1.91386	5.58988	0.711819
1992	0.812562	1992	Inland S-M	X	Sandviken	1992	IN	LIM	C1992/07061	11x/093	<LOQ	<LOQ	0.603	4.568	3.025	6.637	2.409	5.529	0.4	0.265	<LOQ	1.153	259.249	1.713	1.836	0.190919	0.190919	0.603	4.568	3.025	6.637	2.409	5.529	0.4	0.265	0.120208	1.153	259.249	1.713	1.836	0.155133	0.155133	0.489975	3.71178	2.458	5.39297	1.95746	4.49265	0.325025
1993	0.698745	1993	Ostkusten	C	Älvkarleby	1993	GB	MAR	C1993/07111	11x/077	<LOQ	<LOQ	0.619	16.151	7.486	19.831	5.452	18.679	2.223	0.982	<LOQ	1.342	385.438	1.233	0.532	0.190919	0.190919	0.619	16.151	7.486	19.831	5.452	18.679	2.223	0.982	0.120208	1.342	385.438	1.233	0.532	0.133404	0.133404	0.432523	11.2854	5.2308	13.8568	3.80956	13.0519	1.55331
1994	0.771893	1994	Inland N	BD	Gällivare	1994	LP	LIM	C1994/07030	11x/148	<LOQ	<LOQ	0.341	4.527	1.772	2.911	0.477	1.857	0.228	0.121	<LOQ	1.097	51.939	<LOQ	0.179	0.190919	0.190919	0.341	4.527	1.772	2.911	0.477	1.857	0.228	0.121	0.120208	1.097	51.939	0.0212132	0.179	0.147369	0.147369	0.263216	3.49436	1.36779	2.24698	0.368193	1.43341	0.175992
1994	0.793682	1994	Inland N	BD	Kiruna	1994	LP	LIM	C1994/07031	11x139	<LOQ	<LOQ	0.674	20.246	5.913	16.171	3.129	14.877	1.637	0.992	<LOQ	0.93	129.555	0.136	0.212	0.190919	0.190919	0.674	20.246	5.913	16.171	3.129	14.877	1.637	0.992	0.120208	0.93	129.555	0.136	0.212	0.151529	0.151529	0.534941	16.0689	4.69304	12.8346	2.48343	11.8076	1.29926
1994	0.770518	1994	Ostkusten	X	Gävle	1994	GB	MAR	C1994/07026	11x/141	<LOQ	<LOQ	0.691	7.904	3.284	9.007	2.556	9.677	1.306	0.613	<LOQ	0.906	151.736	0.644	0.387	0.190919	0.190919	0.691	7.904	3.284	9.007	2.556	9.677	1.306	0.613	0.120208	0.906	151.736	0.644	0.387	0.147106	0.147106	0.532428	6.09018	2.53038	6.94006	1.96944	7.4563	1.0063
1994	0.928023	1994	Ostkusten	C	Östhammar	1994	GB	MAR	C1994/07025	11x/144	<LOQ	<LOQ	1.692	15.91	5.488	17.297	4.022	7.811	1.179	0.499	<LOQ	1.556	152.028	0.568	0.935	0.190919	0.190919	1.692	15.91	5.488	17.297	4.022	7.811	1.179	0.499	0.120208	1.556	152.028	0.568	0.935	0.177177	0.177177	1.57022	14.7648	5.09299	16.052	3.73251	7.24879	1.09414
1995	0.848183	1995	Inland N	BD	Jokkmokk	1995	LP	LIM	C1995/07029	11x/095	<LOQ	<LOQ	<LOQ	1.395	1.866	3.522	0.735	6.773	0.526	0.36	<LOQ	<LOQ	70.291	0.067	0.089	0.190919	0.190919	0.226274	1.395	1.866	3.522	0.735	6.773	0.526	0.36	0.120208	0.346482	70.291	0.067	0.089	0.161934	0.161934	0.191922	1.18322	1.58271	2.9873	0.623415	5.74474	0.446144
1995	0.89494	1995	Inland S-M	C	Tierp	1995	IN	LIM	C1995/07025	11x/091	<LOQ	<LOQ	<LOQ	0.812	1.148	4.355	1.174	6.381	0.431	0.272	<LOQ	<LOQ	69.519	0.619	0.093	0.190919	0.190919	0.226274	0.812	1.148	4.355	1.174	6.381	0.431	0.272	0.120208	0.346482	69.519	0.619	0.093	0.170861	0.170861	0.202502	0.726692	1.02739	3.89747	1.05066	5.71062	0.385719
1995	0.848507	1995	Inland N	BD	Kiruna	1995	LP	LIM	C1995/07027	11x/094	<LOQ	<LOQ	<LOQ	3.508	1.517	2.533	0.523	0.76	0.095	0.027	<LOQ	<LOQ	35.044	<LOQ	0.117	0.190919	0.190919	0.226274	3.508	1.517	2.533	0.523	0.76	0.095	0.027	0.120208	0.346482	35.044	0.0212132	0.117	0.161996	0.161996	0.191995	2.97656	1.28719	2.14927	0.443769	0.644865	0.0806082
1996	0.902673	1996	Inland N	BD	Kiruna	1996	LP	LIM	C1996/07032	11x/125	<LOQ	<LOQ	<LOQ	3.146	1.164	2.018	0.409	1.114	0.14	0.071	<LOQ	0.596	32.766	0.052	0.204	0.190919	0.190919	0.226274	3.146	1.164	2.018	0.409	1.114	0.14	0.071	0.120208	0.596	32.766	0.052	0.204	0.172337	0.172337	0.204252	2.83981	1.05071	1.82159	0.369193	1.00558	0.126374
1996	0.861917	1996	Ostkusten	AB	Södertälje	1996	BP	MAR	C1996/07027	11x/138	<LOQ	<LOQ	0.903	12.112	4.159	22.891	1.827	11.264	0.691	0.915	<LOQ	3.161	456.082	5.459	1.043	0.190919	0.190919	0.903	12.112	4.159	22.891	1.827	11.264	0.691	0.915	0.120208	3.161	456.082	5.459	1.043	0.164556	0.164556	0.778311	10.4395	3.58471	19.7301	1.57472	9.70863	0.595585
1977	0.928769	1977	Inland N	BD	Gällivare	1977	LP	LIM	C1977/07071	11x/104	<LOQ	<LOQ	<LOQ	<LOQ	0.192	0.284	0.114	0.238	0.05	0.024	<LOQ	0.368	89.461	0.078	0.166	0.190919	0.190919	0.226274	0.13435	0.192	0.284	0.114	0.238	0.05	0.024	0.120208	0.368	89.461	0.078	0.166	0.17732	0.17732	0.210157	0.12478	0.178324	0.263771	0.10588	0.221047	0.0464385
1997	0.84314	1997	Ostkusten	C	Tierp	1997	GB	MAR	C1997/07045	11x/154	<LOQ	<LOQ	0.518	8.635	6.475	13.745	2.773	6.404	1.04	0.584	<LOQ	1.01	262.592	3.094	0.596	0.190919	0.190919	0.518	8.635	6.475	13.745	2.773	6.404	1.04	0.584	0.120208	1.01	262.592	3.094	0.596	0.160971	0.160971	0.436746	7.28051	5.45933	11.589	2.33803	5.39947	0.876865
1988	0.833516	1988	Inland N	BD	Jokkmokk	1988	LP	LIM	C1988/07159	11x/096	<LOQ	<LOQ	<LOQ	4.499	1.985	3.092	0.653	1.488	0.106	0.048	<LOQ	0.57	59.302	<LOQ	0.022	0.190919	0.190919	0.226274	4.499	1.985	3.092	0.653	1.488	0.106	0.048	0.120208	0.57	59.302	0.0212132	0.022	0.159134	0.159134	0.188603	3.74999	1.65453	2.57723	0.544286	1.24027	0.0883527
1998	0.869833	1998	Inland S-M	C	Uppsala	1998	IN	LIM	C1998/07116	11x/136	<LOQ	<LOQ	<LOQ	1.413	1.106	2.219	0.583	2.062	0.309	0.148	<LOQ	1.234	66.088	0.542	0.035	0.190919	0.190919	0.226274	1.413	1.106	2.219	0.583	2.062	0.309	0.148	0.120208	1.234	66.088	0.542	0.035	0.166068	0.166068	0.196821	1.22907	0.962035	1.93016	0.507113	1.7936	0.268778
1998	0.816521	1998	Ostkusten	C	Östhammar	1998	GB	MAR	C1998/07120	11x/129	<LOQ	<LOQ	0.349	6.58	2.923	6.864	1.68	9.958	1.651	1.078	<LOQ	1.438	179.995	0.332	0.149	0.190919	0.190919	0.349	6.58	2.923	6.864	1.68	9.958	1.651	1.078	0.120208	1.438	179.995	0.332	0.149	0.155889	0.155889	0.284966	5.37271	2.38669	5.6046	1.37175	8.13091	1.34808
1998	0.867612	1998	Ostkusten	AB	Österåker	1998	BP	MAR	C1998/07115	11x/134	<LOQ	<LOQ	0.555	7.457	3.89	7.148	1.994	9.254	1.677	0.95	<LOQ	1.939	396.521	4.449	0.19	0.190919	0.190919	0.555	7.457	3.89	7.148	1.994	9.254	1.677	0.95	0.120208	1.939	396.521	4.449	0.19	0.165643	0.165643	0.481525	6.46978	3.37501	6.20169	1.73002	8.02888	1.45499
1999	0.806121	1999	Inland N	BD	Jokkmokk	1999	LP	LIM	C1999/07049	11x/126	<LOQ	<LOQ	<LOQ	6.332	3.109	5.664	1.006	2.332	0.369	0.209	<LOQ	0.541	66.76	<LOQ	0.061	0.190919	0.190919	0.226274	6.332	3.109	5.664	1.006	2.332	0.369	0.209	0.120208	0.541	66.76	0.0212132	0.061	0.153904	0.153904	0.182404	5.10436	2.50623	4.56587	0.810958	1.87987	0.297459
2000	0.90643	2000	Inland S-M	X	Gävle	2000	IN	LIM	C2000/07039	11x/097	<LOQ	<LOQ	<LOQ	0.685	0.939	3.445	1.2	3.407	0.535	0.168	<LOQ	0.195	77.624	1.432	0.263	0.190919	0.190919	0.226274	0.685	0.939	3.445	1.2	3.407	0.535	0.168	0.120208	0.195	77.624	1.432	0.263	0.173055	0.173055	0.205102	0.620905	0.851138	3.12265	1.08772	3.08821	0.48494
2000	0.918658	2000	Ostkusten	AB	Värmdö	2000	BP	MAR	C2000/07038	11x/102	<LOQ	<LOQ	2.2	36.409	14.833	28.474	7.211	30.414	2.32	1.69	<LOQ	4.955	826.877	11.254	0.538	0.190919	0.190919	2.2	36.409	14.833	28.474	7.211	30.414	2.32	1.69	0.120208	4.955	826.877	11.254	0.538	0.175389	0.175389	2.02105	33.4474	13.6265	26.1579	6.62445	27.9401	2.13129
2000	0.573276	2000	Ostkusten	C	Tierp	2000	GB	MAR	C2000/07040	11x/098	<LOQ	<LOQ	0.922	19.385	7.739	24.548	5.062	14.258	1.142	0.779	<LOQ	1.207	213.617	1.329	1.008	0.190919	0.190919	0.922	19.385	7.739	24.548	5.062	14.258	1.142	0.779	0.120208	1.207	213.617	1.329	1.008	0.109449	0.109449	0.528561	11.113	4.43659	14.0728	2.90192	8.17377	0.654682
2001	0.952399	2001	Ostkusten	C	Tierp	2001	GB	MAR	C2001/07048	11x/111	<LOQ	<LOQ	<LOQ	2.121	1.465	4.049	1.225	6.409	0.614	0.397	<LOQ	<LOQ	84.947	0.438	0.084	0.190919	0.190919	0.226274	2.121	1.465	4.049	1.225	6.409	0.614	0.397	0.120208	0.346482	84.947	0.438	0.084	0.181831	0.181831	0.215503	2.02004	1.39526	3.85626	1.16669	6.10393	0.584773
2001	0.775514	2001	Ostkusten	D	Oxelösund	2001	BP	MAR	C2001/07051	11x/116	<LOQ	<LOQ	0.409	6.837	2.136	4.993	1.38	6.107	0.591	0.593	<LOQ	6.044	311.544	2.623	0.323	0.190919	0.190919	0.409	6.837	2.136	4.993	1.38	6.107	0.591	0.593	0.120208	6.044	311.544	2.623	0.323	0.14806	0.14806	0.317185	5.30219	1.6565	3.87214	1.07021	4.73606	0.458329
2001	0.600964	2001	Ostkusten	X	Gävle	2001	GB	MAR	C2001/07046	11x/114	<LOQ	<LOQ	<LOQ	7.116	3.817	14.043	4.308	18.581	1.414	0.981	<LOQ	0.708	163.688	0.962	0.376	0.190919	0.190919	0.226274	7.116	3.817	14.043	4.308	18.581	1.414	0.981	0.120208	0.708	163.688	0.962	0.376	0.114735	0.114735	0.135983	4.27646	2.29388	8.43934	2.58895	11.1665	0.849763
2001	0.8861	2001	Ostkusten	X	Gävle	2001	GB	MAR	C2001/07045	11x/108	<LOQ	<LOQ	1.478	16.133	4.743	13.323	3.443	14.652	1.419	0.736	<LOQ	1.009	181.99	0.482	0.751	0.190919	0.190919	1.478	16.133	4.743	13.323	3.443	14.652	1.419	0.736	0.120208	1.009	181.99	0.482	0.751	0.169173	0.169173	1.30966	14.2954	4.20277	11.8055	3.05084	12.9831	1.25738
2001	0.860108	2001	Ostkusten	AB	Värmdö	2001	BP	MAR	C2001/07050	11x/112	<LOQ	<LOQ	3.061	45.745	14.358	27.572	5.728	30.256	3.312	1.386	<LOQ	2.583	361.479	1.853	0.884	0.190919	0.190919	3.061	45.745	14.358	27.572	5.728	30.256	3.312	1.386	0.120208	2.583	361.479	1.853	0.884	0.164211	0.164211	2.63279	39.3457	12.3494	23.7149	4.9267	26.0234	2.84868
2002	0.792996	2002	Inland N	BD	Kiruna	2002	LP	LIM	C2002/07148	11x/113	<LOQ	<LOQ	<LOQ	5.239	2.844	5.968	1.245	5.051	0.449	0.347	<LOQ	<LOQ	43.597	0.071	0.027	0.190919	0.190919	0.226274	5.239	2.844	5.968	1.245	5.051	0.449	0.347	0.120208	0.346482	43.597	0.071	0.027	0.151398	0.151398	0.179435	4.15451	2.25528	4.7326	0.987281	4.00543	0.356055
2002	0.873677	2002	Inland S-M	E	Linköping	2002	IN	LIM	C2002/07150	11x/101	<LOQ	<LOQ	0.355	3.98	3.736	6.67	1.673	10.692	0.972	0.629	<LOQ	<LOQ	281.517	1.313	0.16	0.190919	0.190919	0.355	3.98	3.736	6.67	1.673	10.692	0.972	0.629	0.120208	0.346482	281.517	1.313	0.16	0.166801	0.166801	0.310155	3.47724	3.26406	5.82743	1.46166	9.34136	0.849214
2002	0.606885	2002	Ostkusten	X	Gävle	2002	GB	MAR	C2002/07142	11x/107	<LOQ	<LOQ	0.857	18.067	7.965	22.089	4.459	30.527	2.532	2.105	<LOQ	1.028	200.606	1.421	0.344	0.190919	0.190919	0.857	18.067	7.965	22.089	4.459	30.527	2.532	2.105	0.120208	1.028	200.606	1.421	0.344	0.115866	0.115866	0.5201	10.9646	4.83384	13.4055	2.7061	18.5264	1.53663
2003	0.509941	2003	Ostkusten	X	Gävle	2003	GB	MAR	C2003/07236	11x/117	<LOQ	<LOQ	1.796	37.848	15.325	43.735	11.169	40.447	2.623	2.234	<LOQ	2.528	461.381	2.89	0.774	0.190919	0.190919	1.796	37.848	15.325	43.735	11.169	40.447	2.623	2.234	0.120208	2.528	461.381	2.89	0.774	0.0973574	0.0973574	0.915854	19.3002	7.81485	22.3023	5.69553	20.6256	1.33758
2004	0.902027	2004	Inland S-M	C	Tierp	2004	IN	LIM	C2004/07031	11x/130	<LOQ	<LOQ	<LOQ	1.193	1.791	6.171	2.09	8.836	0.968	0.655	<LOQ	0.523	84.133	1.669	0.107	0.190919	0.190919	0.226274	1.193	1.791	6.171	2.09	8.836	0.968	0.655	0.120208	0.523	84.133	1.669	0.107	0.172214	0.172214	0.204105	1.07612	1.61553	5.56641	1.88524	7.97031	0.873162
2004	0.836363	2004	Inland S-M	H	Vimmerby	2004	IN	LIM	C2004/07023	11x/123	<LOQ	<LOQ	<LOQ	2.658	4.311	9.18	2.375	7.853	0.926	0.58	<LOQ	<LOQ	90.97	1.49	0.134	0.190919	0.190919	0.226274	2.658	4.311	9.18	2.375	7.853	0.926	0.58	0.120208	0.346482	90.97	1.49	0.134	0.159677	0.159677	0.189247	2.22305	3.60556	7.67781	1.98636	6.56796	0.774472
2004	0.8311	2004	Inland N	BD	Jokkmokk	2004	LP	LIM	C2004/07027	11x/124	<LOQ	<LOQ	<LOQ	9.119	4.597	8.847	1.605	5.959	0.445	0.453	<LOQ	0.827	38.343	0.061	0.271	0.190919	0.190919	0.226274	9.119	4.597	8.847	1.605	5.959	0.445	0.453	0.120208	0.827	38.343	0.061	0.271	0.158673	0.158673	0.188056	7.5788	3.82057	7.35274	1.33392	4.95252	0.369839
2005	0.854293	2005	Inland N	BD	Gällivare	2005	LP	LIM	C2005/07056	11x/133	<LOQ	<LOQ	<LOQ	8.647	4.643	10.569	2.503	6.945	0.623	0.497	<LOQ	<LOQ	37.503	0.055	0.02	0.190919	0.190919	0.226274	8.647	4.643	10.569	2.503	6.945	0.623	0.497	0.120208	0.346482	37.503	0.055	0.02	0.163101	0.163101	0.193304	7.38707	3.96648	9.02902	2.1383	5.93306	0.532224
2005	0.579695	2005	Inland N	BD	Kiruna	2005	LP	LIM	C2005/07055	11x/118	<LOQ	<LOQ	0.448	7.873	2.968	6.137	1.67	6.228	0.855	0.631	<LOQ	<LOQ	49.866	0.164	0.037	0.190919	0.190919	0.448	7.873	2.968	6.137	1.67	6.228	0.855	0.631	0.120208	0.346482	49.866	0.164	0.037	0.110675	0.110675	0.259703	4.56394	1.72053	3.55759	0.968091	3.61034	0.495639
2005	0.8	2005	Inland S-M	X	Gävle	2005	IN	LIM	C2005/07033	11x/132	<LOQ	<LOQ	<LOQ	1.915	2.33	6.976	2.164	9.342	1.094	0.847	<LOQ	<LOQ	73.771	1.441	0.214	0.190919	0.190919	0.226274	1.915	2.33	6.976	2.164	9.342	1.094	0.847	0.120208	0.346482	73.771	1.441	0.214	0.152735	0.152735	0.181019	1.532	1.864	5.5808	1.7312	7.4736	0.8752
2005	0.845874	2005	Inland S-M	C	Heby	2005	IN	LIM	C2005/07034	11x/128	<LOQ	<LOQ	<LOQ	0.992	3.572	8.539	1.805	5.479	0.768	0.505	<LOQ	<LOQ	158.498	2.614	0.244	0.190919	0.190919	0.226274	0.992	3.572	8.539	1.805	5.479	0.768	0.505	0.120208	0.346482	158.498	2.614	0.244	0.161493	0.161493	0.191399	0.839107	3.02146	7.22292	1.5268	4.63454	0.649631
2005	0.8	2005	Inland S-M	X	Sandviken	2005	IN	LIM	C2005/07035	11x/137	<LOQ	<LOQ	<LOQ	2.051	6.96	16.85	4.515	21.645	3.033	1.848	<LOQ	<LOQ	193.693	4.747	0.29	0.190919	0.190919	0.226274	2.051	6.96	16.85	4.515	21.645	3.033	1.848	0.120208	0.346482	193.693	4.747	0.29	0.152735	0.152735	0.181019	1.6408	5.568	13.48	3.612	17.316	2.4264
2005	0.794238	2005	Ostkusten	D	Nyköping	2005	BP	MAR	C2005/07028	11x/131	<LOQ	<LOQ	2.109	50.052	19.287	34.73	7.822	23.501	3.602	2.365	<LOQ	3.259	525.724	9.035	0.325	0.190919	0.190919	2.109	50.052	19.287	34.73	7.822	23.501	3.602	2.365	0.120208	3.259	525.724	9.035	0.325	0.151635	0.151635	1.67505	39.7532	15.3185	27.5839	6.21253	18.6654	2.86085
2005	0.907987	2005	Ostkusten	D	Nyköping	2005	BP	MAR	C2005/07029	11x/121	<LOQ	<LOQ	1.87	50.928	10.136	15.953	3.624	10.92	1.187	0.804	<LOQ	2.392	267.41	1.445	0.352	0.190919	0.190919	1.87	50.928	10.136	15.953	3.624	10.92	1.187	0.804	0.120208	2.392	267.41	1.445	0.352	0.173352	0.173352	1.69794	46.2419	9.20335	14.4851	3.29054	9.91521	1.07778
2007	0.941726	2007	Ostkusten	D	Nyköping	2007	BP	MAR	C2007/00385	11x/140	<LOQ	<LOQ	1.054	33.431	13.591	20.685	5.507	14.794	2.253	1.458	<LOQ	2.801	352.865	2.496	0.076	0.190919	0.190919	1.054	33.431	13.591	20.685	5.507	14.794	2.253	1.458	0.120208	2.801	352.865	2.496	0.076	0.179793	0.179793	0.992579	31.4828	12.799	19.4796	5.18608	13.9319	2.12171
2007	0.960715	2007	Ostkusten	X	Gävle	2007	GB	MAR	C2007/00386	11x/153	<LOQ	<LOQ	0.742	12.442	6.097	16.661	5.044	18.972	2.351	1.517	<LOQ	1.135	130.019	0.681	0.333	0.190919	0.190919	0.742	12.442	6.097	16.661	5.044	18.972	2.351	1.517	0.120208	1.135	130.019	0.681	0.333	0.183419	0.183419	0.71285	11.9532	5.85748	16.0065	4.84584	18.2267	2.25864
2008	0.885439	2008	Inland N	BD	Gällivare	2008	LP	LIM	C2008/00507	11x/146	<LOQ	<LOQ	<LOQ	5.81	5.756	11.068	4.113	12.998	1.823	1.09	<LOQ	0.634	12.388	<LOQ	0.108	0.190919	0.190919	0.226274	5.81	5.756	11.068	4.113	12.998	1.823	1.09	0.120208	0.634	12.388	0.0212132	0.108	0.169047	0.169047	0.200352	5.1444	5.09658	9.80003	3.64181	11.5089	1.61415
2008	0.783501	2008	Ostkusten	AB	Haninge	2008	BP	MAR	C2008/00500	11x/149	<LOQ	<LOQ	0.652	11.634	7.111	11.631	4.258	17.948	2.679	1.596	<LOQ	3.142	277.548	3.279	0.119	0.190919	0.190919	0.652	11.634	7.111	11.631	4.258	17.948	2.679	1.596	0.120208	3.142	277.548	3.279	0.119	0.149585	0.149585	0.510843	9.11525	5.57148	9.1129	3.33615	14.0623	2.099
2008	0.897904	2008	Ostkusten	X	Gävle	2008	GB	MAR	C2008/00498	11x/142	<LOQ	<LOQ	0.908	14.95	8.77	21.48	6.395	31.17	3.598	2.596	<LOQ	0.939	187.724	0.994	0.202	0.190919	0.190919	0.908	14.95	8.77	21.48	6.395	31.17	3.598	2.596	0.120208	0.939	187.724	0.994	0.202	0.171427	0.171427	0.815297	13.4237	7.87462	19.287	5.7421	27.9877	3.23066
2009	0.798005	2009	Ostkusten	C	Östhammar	2009	GB	MAR	C2009/05033	11x/150	<LOQ	<LOQ	0.53	4.858	3.093	5.309	1.674	5.71	0.906	0.584	<LOQ	0.698	86.306	0.282	0.024	0.190919	0.190919	0.53	4.858	3.093	5.309	1.674	5.71	0.906	0.584	0.120208	0.698	86.306	0.282	0.024	0.152354	0.152354	0.422943	3.87671	2.46823	4.23661	1.33586	4.55661	0.722992
2009	0.840631	2009	Inland S-M	C	Tierp	2009	IN	LIM	C2009/05023	11x/150	<LOQ	<LOQ	<LOQ	1.884	3.163	8.319	3.279	10.441	1.733	1.11	<LOQ	<LOQ	111.094	1.559	0.106	0.190919	0.190919	0.226274	1.884	3.163	8.319	3.279	10.441	1.733	1.11	0.120208	0.346482	111.094	1.559	0.106	0.160492	0.160492	0.190213	1.58375	2.65892	6.99321	2.75643	8.77703	1.45681
2009	0.87137	2009	Ostkusten	AB	Haninge	2009	BP	MAR	C2009/05032	11x/143	<LOQ	<LOQ	<LOQ	12.322	8.202	15.24	4.985	20.627	2.646	1.655	<LOQ	1.728	201.365	1.317	0.147	0.190919	0.190919	0.226274	12.322	8.202	15.24	4.985	20.627	2.646	1.655	0.120208	1.728	201.365	1.317	0.147	0.166361	0.166361	0.197169	10.737	7.14698	13.2797	4.34378	17.9738	2.30565
2009	0.859439	2009	Inland N	BD	Gällivare	2009	LP	LIM	C2009/05027	11x/145	<LOQ	<LOQ	0.453	4.876	7.258	14.739	4.314	12.067	2.519	1.148	<LOQ	0.935	130.147	0.33	0.171	0.190919	0.190919	0.453	4.876	7.258	14.739	4.314	12.067	2.519	1.148	0.120208	0.935	130.147	0.33	0.171	0.164083	0.164083	0.389326	4.19062	6.23781	12.6673	3.70762	10.3708	2.16493
2009	0.19484	2009	Ostkusten	X	Gävle	2009	GB	MAR	C2009/05022	11x/152	<LOQ	<LOQ	0.608	39.694	27.963	72.345	22.289	109.52	12.509	8.651	<LOQ	1.671	595.713	3.066	0.749	0.190919	0.190919	0.608	39.694	27.963	72.345	22.289	109.52	12.509	8.651	0.120208	1.671	595.713	3.066	0.749	0.0371986	0.0371986	0.118463	7.73397	5.4483	14.0957	4.34278	21.3388	2.43725
2010	0.859658	2010	Inland S-M	C	Östhammar	2010	IN	LIM	C2010/11319	11x/119	<LOQ	<LOQ	<LOQ	1.308	1.95	3.371	1.103	3.802	0.39	0.27	<LOQ	<LOQ	89.267	0.749	<LOQ	0.190919	0.190919	0.226274	1.308	1.95	3.371	1.103	3.802	0.39	0.27	0.120208	0.346482	89.267	0.749	0.00707107	0.164125	0.164125	0.194518	1.12443	1.67633	2.89791	0.948203	3.26842	0.335267
2010	0.8	2010	Inland N	BD	Arjeplog	2010	LP	LIM	C2010/11316	11x/127	<LOQ	<LOQ	<LOQ	5.523	4.377	7.377	2.498	12.262	1.813	0.851	<LOQ	<LOQ	40.283	0.145	0.044	0.190919	0.190919	0.226274	5.523	4.377	7.377	2.498	12.262	1.813	0.851	0.120208	0.346482	40.283	0.145	0.044	0.152735	0.152735	0.181019	4.4184	3.5016	5.9016	1.9984	9.8096	1.4504
2010	0.856933	2010	Ostkusten	D	Nyköping	2010	BP	MAR	C2010/11322	11x/120	<LOQ	<LOQ	1.185	31.142	15.581	25.897	6.529	48.541	4.059	3.359	<LOQ	3.97	339.18	1.652	0.127	0.190919	0.190919	1.185	31.142	15.581	25.897	6.529	48.541	4.059	3.359	0.120208	3.97	339.18	1.652	0.127	0.163605	0.163605	1.01547	26.6866	13.3519	22.192	5.59492	41.5964	3.47829
2010	0.831526	2010	Ostkusten	C	Östhammar	2010	GB	MAR	C2010/11321	11x/222	<LOQ	<LOQ	1.004	13.645	5.423	5.809	2.587	8.325	1.054	0.467	<LOQ	1.055	127.962	0.289	0.137	0.190919	0.190919	1.004	13.645	5.423	5.809	2.587	8.325	1.054	0.467	0.120208	1.055	127.962	0.289	0.137	0.158754	0.158754	0.834852	11.3462	4.50937	4.83033	2.15116	6.92245	0.876428
2015	0.8	2015	Ostkusten	X	Gävle	2015	GB	MAR	C2015/05599	PAX15/0296	0.65675	<LOQ	0.26459	4.96847	2.0526	4.42788	1.57626	5.01921	0.94981	0.91883	<LOQ	0.45332	54.5931	0.21195	0.05915	0.65675	0.0212132	0.26459	4.96847	2.0526	4.42788	1.57626	5.01921	0.94981	0.91883	0.00707107	0.4488	54.5931	0.21195	0.05915	0.5254	0.0169706	0.211672	3.97478	1.64208	3.5423	1.26101	4.01537	0.759848
2015	0.8	2015	Inland S-M	X	Sandviken	2015	IN	LIM	C2015/05600	PAX15/0297	<LOQ	<LOQ	<LOQ	3.35143	6.6702	13.2399	3.36672	6.35734	0.57784	0.86216	<LOQ	0.18614	91.8364	1.45468	0.17562	0.212132	0.0212132	0.141421	3.35143	6.6702	13.2399	3.36672	6.35734	0.57784	0.86216	0.00707107	0.18551	91.8364	1.45468	0.17562	0.169706	0.0169706	0.113137	2.68114	5.33616	10.5919	2.69338	5.08587	0.462272
2015	0.8	2015	Ostkusten	X	Hudiksvall	2015	GB	MAR	C2015/05601	PAX15/0298	0.56545	0.03261	0.74068	45.4305	17.7143	32.0256	7.50146	24.8406	1.80846	3.08293	<LOQ	2.73459	327.98	0.49433	0.12557	0.56545	0.03261	0.74068	45.4305	17.7143	32.0256	7.50146	24.8406	1.80846	3.08293	0.00707107	2.73459	327.98	0.49433	0.12557	0.45236	0.026088	0.592544	36.3444	14.1714	25.6205	6.00117	19.8725	1.44677
2015	0.8	2015	Ostkusten	X	Gävle	2015	GB	MAR	C2015/05602	PAX15/0299	<LOQ	<LOQ	0.38312	22.005	10.4392	23.9599	7.09306	24.1636	1.35102	3.63635	<LOQ	1.27421	212.81	0.52866	0.54201	0.212132	0.0212132	0.38312	22.005	10.4392	23.9599	7.09306	24.1636	1.35102	3.63635	0.00707107	1.27421	212.81	0.52866	0.54201	0.169706	0.0169706	0.306496	17.604	8.35137	19.168	5.67445	19.3309	1.08082
2015	0.8	2015	Ostkusten	C	Älvkarleby	2015	GB	MAR	C2015/05603	PAX15/0300	<LOQ	<LOQ	0.41237	14.3871	7.6387	17.0959	5.00441	14.8717	3.9337	2.90531	<LOQ	1.06972	223.548	1.57473	0.17498	0.212132	0.0212132	0.41237	14.3871	7.6387	17.0959	5.00441	14.8717	3.9337	2.90531	0.00707107	1.06037	223.548	1.57473	0.17498	0.169706	0.0169706	0.329896	11.5096	6.11096	13.6768	4.00353	11.8973	3.14696
2015	0.8	2015	Inland S-M	E	Söderköping	2015	IN	LIM	C2015/05604	PAX15/0301	<LOQ	<LOQ	0.51626	3.46305	1.89572	3.12555	1.34148	3.88199	0.65334	0.96336	<LOQ	0.20275	58.8414	0.1836	0.06162	0.212132	0.0212132	0.51626	3.46305	1.89572	3.12555	1.34148	3.88199	0.65334	0.96336	0.00707107	0.20057	58.8414	0.1836	0.06162	0.169706	0.0169706	0.413008	2.77044	1.51658	2.50044	1.07318	3.10559	0.522672
2015	0.8	2015	Inland S-M	E	Söderköping	2015	IN	LIM	C2015/05605	PAX15/0302	0.31036	0.04492	0.84788	6.65276	3.33359	5.07191	1.85654	5.94841	1.05874	1.64777	<LOQ	0.39219	92.621	0.30222	0.08984	0.31036	0.04492	0.84788	6.65276	3.33359	5.07191	1.85654	5.94841	1.05874	1.64777	0.00707107	0.3829	92.621	0.30222	0.08984	0.248288	0.035936	0.678304	5.32221	2.66687	4.05753	1.48523	4.75873	0.846992
2015	0.8	2015	Ostkusten	AB	Norrtälje	2015	BP	MAR	C2015/05606	PAX15/0303	<LOQ	0.0472	<LOQ	10.5408	6.78774	15.8538	5.11027	13.2531	1.91661	1.92254	0.12028	0.3971	202.937	1.00065	0.23498	0.212132	0.0472	0.141421	10.5408	6.78774	15.8538	5.11027	13.2531	1.91661	1.92254	0.12028	0.39658	202.937	1.00065	0.23498	0.169706	0.03776	0.113137	8.43262	5.43019	12.683	4.08822	10.6024	1.53329
2015	0.8	2015	Ostkusten	AB	Norrtälje	2015	BP	MAR	C2015/05607	PAX15/0304	<LOQ	0.03827	1.61051	42.495	17.0308	28.5004	6.77731	18.215	3.47604	2.41655	<LOQ	2.19746	216.362	0.52005	0.16009	0.212132	0.03827	1.61051	42.495	17.0308	28.5004	6.77731	18.215	3.47604	2.41655	0.00707107	2.19746	216.362	0.52005	0.16009	0.169706	0.030616	1.28841	33.996	13.6247	22.8003	5.42185	14.572	2.78083
2015	0.8	2015	Ostkusten	AB	Norrtälje	2015	BP	MAR	C2015/05608	PAX15/0305	<LOQ	<LOQ	1.62995	36.8685	17.6493	24.6402	5.70039	16.408	3.57946	2.93714	<LOQ	1.78054	184.449	0.51644	0.21452	0.212132	0.0212132	1.62995	36.8685	17.6493	24.6402	5.70039	16.408	3.57946	2.93714	0.00707107	1.78054	184.449	0.51644	0.21452	0.169706	0.0169706	1.30396	29.4948	14.1195	19.7122	4.56031	13.1264	2.86357
2015	0.8	2015	Ostkusten	K	Karlskrona	2015	BP	MAR	C2015/05609	PAX15/0306	<LOQ	<LOQ	0.54636	11.1548	6.9702	14.4616	3.97676	9.12079	0.92114	1.3632	<LOQ	0.51123	181.147	0.78371	0.34964	0.212132	0.0212132	0.54636	11.1548	6.9702	14.4616	3.97676	9.12079	0.92114	1.3632	0.00707107	0.50712	181.147	0.78371	0.34964	0.169706	0.0169706	0.437088	8.92387	5.57616	11.5693	3.18141	7.29663	0.736912
2015	0.8	2015	Ostkusten	K	Karlskrona	2015	BP	MAR	C2015/05610	PAX15/0307	<LOQ	<LOQ	0.38254	13.6633	7.18115	14.6429	4.17344	10.5624	2.38454	1.44389	<LOQ	0.84674	187.884	0.71651	0.19596	0.212132	0.0212132	0.38254	13.6633	7.18115	14.6429	4.17344	10.5624	2.38454	1.44389	0.00707107	0.84478	187.884	0.71651	0.19596	0.169706	0.0169706	0.306032	10.9306	5.74492	11.7144	3.33875	8.44994	1.90763
2015	0.8	2015	Ostkusten	E	Valdemarsvik	2015	BP	MAR	C2015/05612	PAX15/0309	<LOQ	0.04638	0.39127	8.36256	5.40688	12.359	3.39908	7.86856	1.50866	0.98032	<LOQ	0.57973	113.372	0.64762	0.08152	0.212132	0.04638	0.39127	8.36256	5.40688	12.359	3.39908	7.86856	1.50866	0.98032	0.00707107	0.57973	113.372	0.64762	0.08152	0.169706	0.037104	0.313016	6.69005	4.3255	9.88719	2.71926	6.29485	1.20693
2015	0.8	2015	Ostkusten	E	Valdemarsvik	2015	BP	MAR	C2015/05613	PAX15/0310	<LOQ	0.00295	0.36454	10.4597	4.45646	9.26799	2.77019	7.07979	1.45695	0.60964	<LOQ	1.0058	286.397	0.74576	0.12256	0.212132	0.00295	0.36454	10.4597	4.45646	9.26799	2.77019	7.07979	1.45695	0.60964	0.00707107	1.0058	286.397	0.74576	0.12256	0.169706	0.00236	0.291632	8.36775	3.56517	7.41439	2.21615	5.66383	1.16556
2015	0.8	2015	Ostkusten	E	Valdemarsvik	2015	BP	MAR	C2015/05614	PAX15/0311	<LOQ	0.00586	<LOQ	5.58561	3.99783	10.3238	3.1759	7.55252	1.64356	1.02943	<LOQ	0.62966	166.018	0.76873	0.09172	0.212132	0.00586	0.141421	5.58561	3.99783	10.3238	3.1759	7.55252	1.64356	1.02943	0.00707107	0.62253	166.018	0.76873	0.09172	0.169706	0.004688	0.113137	4.46849	3.19826	8.25907	2.54072	6.04202	1.31485
2015	0.8	2015	Ostkusten	H	Mörbylånga	2015	BP	MAR	C2015/05615	PAX15/0312	<LOQ	0.03069	1.54142	27.8957	14.9084	26.0256	7.82828	18.4041	4.26476	2.45738	<LOQ	1.84524	313.579	1.47856	0.29576	0.212132	0.03069	1.54142	27.8957	14.9084	26.0256	7.82828	18.4041	4.26476	2.45738	0.00707107	1.84524	313.579	1.47856	0.29576	0.169706	0.024552	1.23314	22.3166	11.9267	20.8205	6.26262	14.7232	3.41181
2015	0.8	2015	Ostkusten	H	Mörbylånga	2015	BP	MAR	C2015/05616	PAX15/0313	<LOQ	<LOQ	0.59443	8.77848	4.88674	11.8303	3.69329	10.0227	2.41086	1.63553	<LOQ	1.23964	112.562	0.44453	0.13466	0.212132	0.0212132	0.59443	8.77848	4.88674	11.8303	3.69329	10.0227	2.41086	1.63553	0.00707107	1.23964	112.562	0.44453	0.13466	0.169706	0.0169706	0.475544	7.02278	3.90939	9.46423	2.95463	8.01818	1.92869
2015	0.8	2015	Ostkusten	H	Mörbylånga	2015	BP	MAR	C2015/05617	PAX15/0314	<LOQ	<LOQ	0.5634	12.0488	7.54421	15.6752	5.10338	15.3814	3.74349	3.3718	<LOQ	1.13024	152.144	0.63736	0.30938	0.212132	0.0212132	0.5634	12.0488	7.54421	15.6752	5.10338	15.3814	3.74349	3.3718	0.00707107	1.12614	152.144	0.63736	0.30938	0.169706	0.0169706	0.45072	9.63906	6.03537	12.5401	4.0827	12.3051	2.99479
2015	0.8	2015	Ostkusten	E	Norrköping	2015	BP	MAR	C2015/05618	PAX15/0315	<LOQ	<LOQ	1.35431	34.9279	17.7137	24.8816	6.30862	15.1914	3.78983	2.98491	<LOQ	3.98759	401.717	2.36856	0.28879	0.212132	0.0212132	1.35431	34.9279	17.7137	24.8816	6.30862	15.1914	3.78983	2.98491	0.00707107	3.98759	401.717	2.36856	0.28879	0.169706	0.0169706	1.08345	27.9423	14.1709	19.9053	5.0469	12.1532	3.03186
2015	0.8	2015	Inland S-M	D	Gnesta	2015	IN	LIM	C2015/05619	PAX15/0316	<LOQ	0.03124	0.35482	1.95633	3.8824	5.39468	1.51854	3.67773	1.37126	1.01153	<LOQ	0.35734	89.5618	1.17098	0.12674	0.212132	0.03124	0.35482	1.95633	3.8824	5.39468	1.51854	3.67773	1.37126	1.01153	0.00707107	0.34798	89.5618	1.17098	0.12674	0.169706	0.024992	0.283856	1.56506	3.10592	4.31574	1.21483	2.94218	1.09701
2015	0.8	2015	Inland S-M	U	Surahammar	2015	IN	LIM	C2015/05620	PAX15/0317	<LOQ	<LOQ	<LOQ	2.05777	4.05519	9.51099	2.94056	8.70429	1.83979	2.21799	<LOQ	0.1588	63.5618	0.42957	0.06596	0.212132	0.0212132	0.141421	2.05777	4.05519	9.51099	2.94056	8.70429	1.83979	2.21799	0.00707107	0.1541	63.5618	0.42957	0.06596	0.169706	0.0169706	0.113137	1.64622	3.24415	7.60879	2.35245	6.96343	1.47183
2016	0.8	2016	Ostkusten	AB	Värmdö	2016	BP	MAR	C2016/07638	PAX001	<LOQ	<LOQ	0.925684	11.2925	9.61567	12.0667	4.54479	5.04837	0.57311	0.10035	<LOQ	1.35244	184.115	1.23989	0.316989	0.0848528	0.0353553	0.932756	11.2925	9.61567	12.0667	4.54479	5.04837	0.57311	0.10035	0.0212132	1.35244	184.115	1.23989	0.316989	0.0678823	0.0282843	0.746204	9.03399	7.69254	9.65338	3.63583	4.0387	0.458488
2016	0.8	2016	Ostkusten	C	Östhammar	2016	GB	MAR	C2016/07639	PAX002	<LOQ	<LOQ	0.387484	9.51365	8.50379	11.1921	3.49746	6.33674	0.76851	0.2864	<LOQ	0.500856	162.414	0.38785	0.143827	0.0848528	0.0353553	0.596564	9.51365	8.50379	11.1921	3.49746	6.33674	0.76851	0.2864	0.0212132	0.500856	162.414	0.38785	0.143827	0.0678823	0.0282843	0.477251	7.61092	6.80303	8.9537	2.79797	5.06939	0.614808
2016	0.8	2016	Ostkusten	AB	Norrtälje	2016	BP	MAR	C2016/07640	PAX003	<LOQ	<LOQ	0.312841	7.67301	5.80424	8.70797	3.61458	2.63409	0.59887	0.17199	<LOQ	0.683605	185.511	0.73828	0.153009	0.0848528	0.0353553	0.319912	7.67301	5.80424	8.70797	3.61458	2.63409	0.59887	0.17199	0.0212132	0.683605	185.511	0.73828	0.174222	0.0678823	0.0282843	0.25593	6.13841	4.64339	6.96638	2.89166	2.10727	0.479096
2016	0.8	2016	Ostkusten	AB	Norrtälje	2016	BP	MAR	C2016/07641	PAX004	<LOQ	<LOQ	1.52166	22.1077	16.7812	30.7001	10.5422	22.0155	1.8139	0.56122	<LOQ	5.55676	943.044	6.9803	0.660809	0.0848528	0.0353553	1.61215	22.1077	16.7812	30.7001	10.5422	22.0155	1.8139	0.56122	0.0212132	5.42636	943.044	6.9803	0.660809	0.0678823	0.0282843	1.28972	17.6862	13.4249	24.56	8.43379	17.6124	1.45112
2016	0.8	2016	Ostkusten	AB	Norrtälje	2016	BP	MAR	C2016/07642	PAX005	<LOQ	<LOQ	0.625838	13.6318	9.17216	18.1923	7.80985	22.6794	3.01688	1.45213	<LOQ	3.43328	453.406	2.16527	0.139966	0.0848528	0.0353553	0.649818	13.6318	9.17216	18.1923	7.80985	22.6794	3.01688	1.45213	0.0212132	3.35964	453.406	2.16527	0.139966	0.0678823	0.0282843	0.519854	10.9054	7.33773	14.5539	6.24788	18.1435	2.4135
2016	0.8	2016	Ostkusten	AB	Norrtälje	2016	BP	MAR	C2016/07643	PAX006	<LOQ	0.06485	0.840704	22.607	13.3391	13.1382	3.13205	4.91057	1.38926	1.12228	<LOQ	0.895057	152.916	0.22711	<LOQ	0.0848528	0.06485	0.847775	22.607	13.3391	13.1382	3.13205	4.91057	1.38926	1.12228	0.0212132	0.848847	152.916	0.22711	0.0919239	0.0678823	0.05188	0.67822	18.0856	10.6713	10.5105	2.50564	3.92846	1.11141
2016	0.8	2016	Ostkusten	AB	Norrtälje	2016	BP	MAR	C2016/07646	PAX008	<LOQ	<LOQ	1.7408	25.9954	19.5589	35.4405	12.6659	27.1576	3.13802	1.0158	<LOQ	5.87685	1047.75	5.98809	0.897687	0.0848528	0.0353553	1.74787	25.9954	19.5589	35.4405	12.6659	27.1576	3.13802	1.0158	0.0212132	5.87685	1047.75	5.98809	0.897687	0.0678823	0.0282843	1.3983	20.7963	15.6471	28.3524	10.1327	21.7261	2.51042
2016	0.8	2016	Ostkusten	X	Hudiksvall	2016	GB	MAR	C2016/07879	PAX009	<LOQ	<LOQ	0.97154	13.8668	7.94703	15.1576	5.75896	12.7162	1.10034	0.3343	<LOQ	0.709114	228.598	0.54674	0.314242	0.0848528	0.0353553	1.02877	13.8668	7.94703	15.1576	5.75896	12.7162	1.10034	0.3343	0.0212132	0.681474	228.598	0.54674	0.314242	0.0678823	0.0282843	0.823016	11.0935	6.35762	12.1261	4.60717	10.173	0.880272
2016	0.8	2016	Ostkusten	X	Gävle	2016	GB	MAR	C2016/07880	PAX010	<LOQ	<LOQ	0.17487	5.17264	2.92356	4.46067	1.90872	4.74366	0.82217	0.17664	<LOQ	0.599597	63.6308	0.22653	<LOQ	0.0848528	0.0353553	0.19907	5.17264	2.92356	4.46067	1.90872	4.74366	0.82217	0.17664	0.0212132	0.564617	63.6308	0.22653	0.0919239	0.0678823	0.0282843	0.159256	4.13811	2.33885	3.56854	1.52698	3.79493	0.657736
2016	0.8	2016	Ostkusten	E	Valdemarsvik	2016	BP	MAR	C2016/07881	PAX011	<LOQ	<LOQ	1.6122	41.3332	32.5978	63.6675	17.5727	27.2738	3.84573	3.41301	<LOQ	4.03356	632.791	2.78088	0.462675	0.0848528	0.0353553	1.64352	41.3332	32.5978	63.6675	17.5727	27.2738	3.84573	3.41301	0.0212132	4.03356	632.791	2.78088	0.462675	0.0678823	0.0282843	1.31482	33.0666	26.0782	50.934	14.0582	21.819	3.07658
2017	0.8	2017	Ostkusten	C	Östhammar	2017	GB	MAR	C2017/13677	PAX18/0138	<LOQ	0.0382625	0.887734	39.2064	29.1851	28.7031	4.49371	10.4314	0.88966	0.975685	<LOQ	0.565061	134.56	0.209178	0.337743	0.0148492	0.0382625	0.887734	39.2064	29.1851	28.7031	4.49371	10.4314	0.88966	0.975685	0.0127279	0.565061	119.937	0.0990557	0.218281	0.0118794	0.03061	0.710187	31.3651	23.3481	22.9625	3.59497	8.34511	0.711728
2017	0.8	2017	Ostkusten	C	Östhammar	2017	GB	MAR	C2017/13678	PAX18/0139	<LOQ	<LOQ	0.439897	14.637	22.7423	12.5098	6.37981	12.2816	2.71704	2.41949	<LOQ	1.15262	320.706	0.654452	0.076523	0.0148492	0.0148492	0.439897	14.637	22.7423	12.5098	6.37981	12.2816	2.71704	2.41949	0.0127279	1.15262	294.803	0.387095	0.076523	0.0118794	0.0118794	0.351918	11.7096	18.1938	10.0079	5.10385	9.82532	2.17363
2017	0.8	2017	Ostkusten	C	Östhammar	2017	GB	MAR	C2017/13679	PAX18/0140	<LOQ	<LOQ	0.440724	17.1034	4.3525	9.99647	3.95396	16.595	1.81681	1.98355	<LOQ	0.92808	142.383	0.228479	<LOQ	0.0148492	0.0148492	0.440724	17.1034	4.3525	9.99647	3.95396	16.595	1.81681	1.98355	0.0127279	0.92808	123.549	0.164481	0.0155563	0.0118794	0.0118794	0.352579	13.6827	3.482	7.99718	3.16317	13.276	1.45345
2017	0.8	2017	Ostkusten	C	Tierp	2017	GB	MAR	C2017/13680	PAX18/0141	<LOQ	<LOQ	0.630372	13.9958	3.7836	7.01719	2.91305	9.60899	1.15768	1.41815	<LOQ	1.05868	88.6281	0.196171	<LOQ	0.0148492	0.0148492	0.630372	13.9958	3.7836	7.01719	2.91305	9.60899	1.15768	1.41815	0.0127279	1.05868	77.6079	0.131226	0.0155563	0.0118794	0.0118794	0.504298	11.1966	3.02688	5.61375	2.33044	7.68719	0.926147
2017	0.8	2017	Ostkusten	C	Tierp	2017	GB	MAR	C2017/13681	PAX18/0142	<LOQ	<LOQ	0.489991	12.9678	3.83818	7.33449	3.09891	11.2213	2.09545	2.67154	<LOQ	1.15195	79.869	0.145236	<LOQ	0.0148492	0.0148492	0.489991	12.9678	3.83818	7.33449	3.09891	11.2213	2.09545	2.67154	0.0127279	1.10063	71.3725	0.101527	0.0155563	0.0118794	0.0118794	0.391993	10.3742	3.07055	5.86759	2.47913	8.97706	1.67636
2017	0.8	2017	Ostkusten	C	Tierp	2017	GB	MAR	C2017/13682	PAX18/0143	<LOQ	0.109715	0.540184	4.31965	3.09883	3.36	1.35967	3.58044	1.21348	0.781374	<LOQ	0.665829	45.3311	<LOQ	<LOQ	0.0148492	0.109715	0.540184	4.31965	3.09883	3.36	1.35967	3.58044	1.21348	0.781374	0.0127279	0.665829	37.662	0.0141421	0.0155563	0.0118794	0.0877722	0.432147	3.45572	2.47906	2.688	1.08774	2.86435	0.970787
2017	0.8	2017	Ostkusten	AB	Värmdö	2017	BP	MAR	C2017/13683	PAX18/0144	<LOQ	<LOQ	0.192854	6.42154	4.34426	10.4846	3.75128	6.93438	0.771755	0.654552	<LOQ	0.617483	161.588	0.546258	0.0778303	0.0148492	0.0148492	0.192854	6.42154	4.34426	10.4846	3.75128	6.93438	0.771755	0.654552	0.0127279	0.617483	140.596	0.185275	0.0778303	0.0118794	0.0118794	0.154284	5.13723	3.47541	8.38768	3.00103	5.5475	0.617404
2017	0.8	2017	Ostkusten	AB	Norrtälje	2017	BP	MAR	C2017/13684	PAX18/0145	<LOQ	0.178401	0.253691	10.2638	3.34586	5.88856	2.83481	8.94054	1.01757	1.38173	<LOQ	1.28228	110.486	0.305085	0.0231852	0.0148492	0.178401	0.253691	10.2638	3.34586	5.88856	2.83481	8.94054	1.01757	1.38173	0.0127279	1.28228	91.5343	0.212638	0.0231852	0.0118794	0.14272	0.202953	8.21106	2.67669	4.71085	2.26785	7.15243	0.814059
2017	0.8	2017	Ostkusten	AB	Norrtälje	2017	BP	MAR	C2017/13685	PAX18/0146	<LOQ	0.130631	0.744703	6.47889	3.61892	6.91035	2.51271	4.85165	0.417784	0.382144	<LOQ	0.907919	161.939	0.222757	<LOQ	0.0148492	0.130631	0.744703	6.47889	3.61892	6.91035	2.51271	4.85165	0.417784	0.382144	0.0127279	0.907919	129.72	0.0972973	0.0155563	0.0118794	0.104505	0.595762	5.18311	2.89514	5.52828	2.01017	3.88132	0.334227
2017	0.8	2017	Ostkusten	AB	Södertälje	2017	BP	MAR	C2017/13686	PAX18/0147	<LOQ	<LOQ	0.692896	13.2462	6.41478	7.76443	2.91758	3.71176	1.24129	1.08453	<LOQ	2.15344	109.941	0.583024	0.0498718	0.0148492	0.0148492	0.692896	13.2462	6.41478	7.76443	2.91758	3.71176	1.24129	1.08453	0.0127279	2.15344	91.2638	0.39497	0.0498718	0.0118794	0.0118794	0.554317	10.597	5.13183	6.21155	2.33406	2.96941	0.993032
2017	0.8	2017	Inland S-M	C	Tierp	2017	IN	LIM	C2017/13690	PAX18/0151	<LOQ	0.0382238	0.172922	2.16163	5.96892	12.511	5.52818	7.95823	1.26477	1.33387	<LOQ	0.345266	89.5694	0.66016	0.0549822	0.0148492	0.0382238	0.172922	2.16163	5.96892	12.511	5.52818	7.95823	1.26477	1.33387	0.0127279	0.345266	83.2505	0.56198	0.0549822	0.0118794	0.030579	0.138337	1.7293	4.77513	10.0088	4.42254	6.36659	1.01182
2017	0.8	2017	Ostkusten	X	Hudiksvall	2017	GB	MAR	C2017/13691	PAX18/0152	<LOQ	<LOQ	0.48977	12.9874	7.13012	14.8986	4.77277	14.5677	1.81508	1.6011	<LOQ	0.780611	117.139	0.172416	0.0290726	0.0148492	0.0148492	0.48977	12.9874	7.13012	14.8986	4.77277	14.5677	1.81508	1.6011	0.0127279	0.780611	108.557	0.0948454	0.0290726	0.0118794	0.0118794	0.391816	10.3899	5.7041	11.9189	3.81822	11.6541	1.45207
2017	0.8	2017	Ostkusten	X	Hudiksvall	2017	GB	MAR	C2017/13692	PAX18/0153	<LOQ	<LOQ	0.426558	12.403	5.74296	11.9877	3.86782	10.5276	1.65923	1.40269	<LOQ	0.635304	123.177	0.138165	0.0313987	0.0148492	0.0148492	0.426558	12.403	5.74296	11.9877	3.86782	10.5276	1.65923	1.40269	0.0127279	0.635304	112.711	0.0548774	0.0313987	0.0118794	0.0118794	0.341246	9.92243	4.59437	9.59016	3.09426	8.42205	1.32738
2017	0.8	2017	Ostkusten	H	Västervik	2017	BP	MAR	C2017/13693	PAX18/0154	<LOQ	<LOQ	0.736083	43.9895	20.9251	31.9348	8.94675	18.9426	2.48058	2.06356	<LOQ	1.7765	572.281	1.35083	0.262428	0.0148492	0.0148492	0.736083	43.9895	20.9251	31.9348	8.94675	18.9426	2.48058	2.06356	0.0127279	1.7765	479.97	0.485415	0.214801	0.0118794	0.0118794	0.588866	35.1916	16.7401	25.5478	7.1574	15.1541	1.98446
2017	0.8	2017	Ostkusten	H	Västervik	2017	BP	MAR	C2017/13694	PAX18/0155	0.0763132	0.0788503	0.339514	5.4492	3.44004	7.98274	3.12691	8.05022	1.01914	0.761675	<LOQ	1.22023	223.822	0.414945	0.0387116	0.0763132	0.0788503	0.339514	5.4492	3.44004	7.98274	3.12691	8.05022	1.01914	0.761675	0.0127279	1.22023	182.376	0.205689	0.0387116	0.0610505	0.0630803	0.271611	4.35936	2.75203	6.38619	2.50153	6.44017	0.81531
2017	0.8	2017	Ostkusten	H	Mörbylånga	2017	BP	MAR	C2017/13695	PAX18/0156	<LOQ	0.0507586	3.20831	24.8517	10.3498	14.787	3.6375	7.97728	1.36395	1.16381	<LOQ	3.11207	178.203	0.245094	0.244975	0.0148492	0.0507586	3.20831	24.8517	10.3498	14.787	3.6375	7.97728	1.36395	1.16381	0.0127279	3.11207	143.137	0.0905123	0.195685	0.0118794	0.0406069	2.56664	19.8814	8.2798	11.8296	2.91	6.38182	1.09116
2017	0.8	2017	Ostkusten	H	Mörbylånga	2017	BP	MAR	C2017/13696	PAX18/0157	<LOQ	0.0408285	1.02023	17.6265	7.93567	9.15836	2.27519	5.03481	0.616803	0.36537	<LOQ	0.91922	116.411	0.227203	<LOQ	0.0148492	0.0408285	1.02023	17.6265	7.93567	9.15836	2.27519	5.03481	0.616803	0.36537	0.0127279	0.91922	98.2483	0.115302	0.0155563	0.0118794	0.0326628	0.816187	14.1012	6.34854	7.32669	1.82015	4.02784	0.493442
2017	0.8	2017	Ostkusten	E	Valdemarsvik	2017	BP	MAR	C2017/13697	PAX18/0158	<LOQ	<LOQ	0.31959	5.13244	2.58439	5.24023	2.07116	4.5661	0.91718	0.856517	<LOQ	0.653727	105.739	0.205727	0.102829	0.0148492	0.0148492	0.31959	5.13244	2.58439	5.24023	2.07116	4.5661	0.91718	0.856517	0.0127279	0.653727	85.692	0.0819122	0.0690439	0.0118794	0.0118794	0.255672	4.10595	2.06751	4.19219	1.65693	3.65288	0.733744
2020	0.8	2020	Ostkusten	X	Hudiksvall	2020	GB	MAR	C2020/10449	Q2021-01060	<LOQ	<LOQ	0.586947	16.1002	4.64605	7.01389	2.60682	4.36167	1.09548	0.188937	<LOQ	0.728746	97.9155	0.192048	0.297154	0.0985337	0.0281059	0.586947	16.1002	4.64605	7.01389	2.60682	4.36167	1.09548	0.188937	0.0248737	0.728746	97.9155	0.192048	0.297154	0.0788269	0.0224847	0.469557	12.8802	3.71684	5.61111	2.08546	3.48934	0.876385
2021	0.8	2021	Ostkusten	X	Hudiksvall	2021	GB	MAR	C2021/02598	Q2021-01061	<LOQ	0.0441582	0.918254	22.7749	8.19297	12.5026	3.28102	6.59909	1.05828	0.299268	0.0480157	0.610459	149.379	0.348802	0.153722	0.0997919	0.0441582	0.918254	22.7749	8.19297	12.5026	3.28102	6.59909	1.05828	0.299268	0.0480157	0.610459	149.379	0.348802	0.153722	0.0798336	0.0353265	0.734604	18.2199	6.55437	10.0021	2.62481	5.27927	0.846622
2019	0.8	2019	Ostkusten	X	Hudiksvall	2019	GB	MAR	C2019/07712	Q2021-01062	<LOQ	<LOQ	0.786426	12.8086	5.35406	8.81841	3.38688	5.56318	1.43106	0.268046	0.0410464	1.77966	179.402	0.2992	0.378876	0.100186	0.0285771	0.786426	12.8086	5.35406	8.81841	3.38688	5.56318	1.43106	0.268046	0.0410464	1.77966	179.402	0.2992	0.378876	0.0801485	0.0228617	0.629141	10.2469	4.28324	7.05473	2.70951	4.45055	1.14485
2019	0.8	2019	Ostkusten	X	Gävle	2019	GB	MAR	C2019/07713	Q2021-01063	<LOQ	<LOQ	0.272224	14.7907	6.19296	8.56482	3.58569	5.51452	2.22819	0.703989	<LOQ	0.457805	140.659	0.369125	<LOQ	0.100882	0.0287757	0.272224	14.7907	6.19296	8.56482	3.58569	5.51452	2.22819	0.703989	0.0254665	0.457805	140.659	0.369125	0.0292933	0.0807056	0.0230206	0.21778	11.8325	4.95437	6.85185	2.86855	4.41162	1.78255
2021	0.8	2021	Ostkusten	X	Gävle	2021	GB	MAR	C2021/02602	Q2021-01064	<LOQ	0.0501948	0.35119	12.9034	5.34092	7.35606	3.18532	8.10984	1.23305	0.502407	<LOQ	0.398303	121.997	0.308746	0.0704801	0.100982	0.0501948	0.35119	12.9034	5.34092	7.35606	3.18532	8.10984	1.23305	0.502407	0.0254918	0.398303	121.997	0.308746	0.0704801	0.0807858	0.0401559	0.280952	10.3227	4.27274	5.88485	2.54825	6.48788	0.986437
2020	0.8	2020	Inland N	BD	Arjeplog	2020	LP	LIM	C2020/10453	Q2021-01065	<LOQ	<LOQ	0.0909909	2.46198	3.50843	6.15824	2.76681	5.74545	2.54923	0.734121	<LOQ	<LOQ	11.5812	<LOQ	0.0583874	0.0926055	0.0264149	0.0909909	2.46198	3.50843	6.15824	2.76681	5.74545	2.54923	0.734121	0.0233772	0.0249621	11.5812	0.0254904	0.0583874	0.0740844	0.0211319	0.0727927	1.96959	2.80675	4.92659	2.21345	4.59636	2.03938
2020	0.8	2020	Inland N	BD	Gällivare	2020	LP	LIM	C2020/10454	Q2021-01066	<LOQ	<LOQ	0.17195	4.70113	2.42829	2.99653	0.78153	1.16078	0.210498	0.208369	<LOQ	<LOQ	6.67341	<LOQ	<LOQ	0.0932858	0.026609	0.17195	4.70113	2.42829	2.99653	0.78153	1.16078	0.210498	0.208369	0.0235489	0.0251455	6.67341	0.0256776	0.0270875	0.0746286	0.0212872	0.13756	3.76091	1.94263	2.39722	0.625224	0.928625	0.168398
2019	0.8	2019	Inland N	BD	Arvidsjaur	2019	LP	LIM	C2019/07590	Q2021-01067	<LOQ	<LOQ	0.0641576	4.4469	2.10913	3.1145	1.31744	2.43107	0.864671	0.27398	<LOQ	<LOQ	6.83171	<LOQ	<LOQ	0.079677	0.0227272	0.0641576	4.4469	2.10913	3.1145	1.31744	2.43107	0.864671	0.27398	0.0201136	0.0214772	6.83171	0.0219317	0.0231359	0.0637416	0.0181817	0.0513261	3.55752	1.6873	2.4916	1.05395	1.94486	0.691737
2019	0.8	2019	Inland N	BD	Gällivare	2019	LP	LIM	C2019/07591	Q2021-01068	<LOQ	<LOQ	0.116819	5.3122	2.04259	2.40122	0.531633	0.790671	0.188785	<LOQ	<LOQ	0.101204	8.73438	<LOQ	<LOQ	0.100384	0.0286336	0.116819	5.3122	2.04259	2.40122	0.531633	0.790671	0.188785	0.100384	0.0253407	0.101204	8.73438	0.0276314	0.0291485	0.0803069	0.0229068	0.0934553	4.24976	1.63407	1.92097	0.425307	0.632537	0.151028
2019	0.8	2019	Ostkusten	E	Valdemarsvik	2019	BP	MAR	C2019/07715	Q2021-01069	<LOQ	<LOQ	0.465842	22.6071	13.97	15.1218	6.14373	12.7724	1.83252	0.547328	<LOQ	2.0504	443.517	1.29042	0.0680414	0.087576	0.0249803	0.465842	22.6071	13.97	15.1218	6.14373	12.7724	1.83252	0.547328	0.0221076	2.0504	443.517	1.29042	0.0680414	0.0700608	0.0199842	0.372674	18.0857	11.176	12.0975	4.91498	10.2179	1.46602
2020	0.8	2020	Ostkusten	H	Västervik	2020	BP	MAR	C2020/10447	Q2021-01070	<LOQ	0.0406173	1.14552	29.5234	13.6476	17.8835	4.82674	11.5954	1.47211	0.38157	<LOQ	3.07906	511.124	1.48067	0.0792885	0.099694	0.0406173	1.14552	29.5234	13.6476	17.8835	4.82674	11.5954	1.47211	0.38157	0.0251666	3.07906	511.124	1.48067	0.0792885	0.0797552	0.0324938	0.916414	23.6187	10.9181	14.3068	3.86139	9.2763	1.17769
2020	0.8	2020	Ostkusten	H	Mönsterås	2020	BP	MAR	C2020/10441	Q2021-01071	0.24557	<LOQ	1.28483	14.105	5.49001	9.42473	3.9693	7.17763	0.964308	0.167294	<LOQ	1.38469	221.213	0.63804	0.0538767	0.24557	0.0279163	1.28483	14.105	5.49001	9.42473	3.9693	7.17763	0.964308	0.167294	0.024706	1.38469	221.213	0.63804	0.0538767	0.196456	0.0223331	1.02786	11.284	4.39201	7.53978	3.17544	5.7421	0.771447
2020	0.8	2020	Ostkusten	H	Mönsterås	2020	BP	MAR	C2020/10442	Q2021-01072	0.142201	<LOQ	0.862635	29.3033	15.6612	19.1479	11.9788	11.4543	5.64019	0.572859	<LOQ	3.60504	587.12	5.5592	0.151067	0.142201	0.0284648	0.862635	29.3033	15.6612	19.1479	11.9788	11.4543	5.64019	0.572859	0.0251913	3.60504	587.12	5.5592	0.151067	0.113761	0.0227718	0.690108	23.4427	12.529	15.3184	9.58306	9.16346	4.51215
2019	0.8	2019	Ostkusten	C	Östhammar	2019	GB	MAR	C2019/07588	Q2021-01074	<LOQ	0.0403491	0.196355	4.19407	1.79858	2.89705	0.967558	1.18105	0.502306	0.196811	<LOQ	0.131942	47.204	0.0706151	<LOQ	0.0982478	0.0403491	0.196355	4.19407	1.79858	2.89705	0.967558	1.18105	0.502306	0.196811	0.0248015	0.131942	47.204	0.0706151	0.0285284	0.0785982	0.0322793	0.157084	3.35526	1.43887	2.31764	0.774046	0.944843	0.401844
2019	0.8	2019	Ostkusten	C	Östhammar	2019	GB	MAR	C2019/07589	Q2021-01075	<LOQ	0.0437387	0.97627	15.9736	11.3536	12.6194	4.57854	4.55096	1.69488	0.303683	<LOQ	0.50502	222.371	0.564305	0.159753	0.0975871	0.0437387	0.97627	15.9736	11.3536	12.6194	4.57854	4.55096	1.69488	0.303683	0.0246348	0.50502	222.371	0.564305	0.159753	0.0780697	0.034991	0.781016	12.7789	9.0829	10.0955	3.66283	3.64077	1.3559
2019	0.8	2019	Ostkusten	AB	Värmdö	2019	BP	MAR	C2019/07587	Q2021-01076	<LOQ	<LOQ	0.83757	21.6175	11.7147	18.3965	8.61496	9.81179	1.71766	0.370802	<LOQ	4.48267	831.496	5.16916	0.360378	0.099694	0.0284369	0.83757	21.6175	11.7147	18.3965	8.61496	9.81179	1.71766	0.370802	0.0251666	4.41212	831.496	5.16916	0.360378	0.0797552	0.0227495	0.670056	17.294	9.37175	14.7172	6.89197	7.84943	1.37413
2019	0.8	2019	Ostkusten	I	Gotland	2019	BP	MAR	C2019/07706	Q2021-01078	<LOQ	0.0591295	0.45245	8.33156	4.12278	7.28108	2.02853	3.05479	0.924095	0.208008	<LOQ	0.375311	89.365	0.266509	<LOQ	0.099694	0.0591295	0.45245	8.33156	4.12278	7.28108	2.02853	3.05479	0.924095	0.208008	0.0251666	0.375311	89.365	0.266509	0.0289483	0.0797552	0.0473036	0.36196	6.66525	3.29823	5.82487	1.62282	2.44383	0.739276
2021	0.8	2021	Ostkusten	C	Älvkarleby	2021	GB	MAR	C2021/02600	Q2021-01079	<LOQ	0.0882435	1.16408	24.4354	6.86685	10.0569	4.24045	13.3029	2.27239	0.889217	<LOQ	1.46734	168.643	0.345408	<LOQ	0.100982	0.0882435	1.16408	24.4354	6.86685	10.0569	4.24045	13.3029	2.27239	0.889217	0.0254918	1.46734	168.643	0.345408	0.0293224	0.0807858	0.0705948	0.931263	19.5483	5.49348	8.04549	3.39236	10.6423	1.81791
2019	0.8	2019	Ostkusten	H	Mönsterås	2019	BP	MAR	C2019/07705	Q2021-01080	<LOQ	<LOQ	0.335101	5.98949	4.04966	7.23438	2.18852	3.39301	0.393253	<LOQ	<LOQ	0.430435	89.9595	0.316522	<LOQ	0.0998901	0.0284928	0.335101	5.98949	4.04966	7.23438	2.18852	3.39301	0.393253	0.0998901	0.0252161	0.430435	89.9595	0.316522	0.0290052	0.0799121	0.0227942	0.268081	4.79159	3.23973	5.7875	1.75081	2.71441	0.314602
2020	0.8	2020	Ostkusten	H	Västervik	2020	BP	MAR	C2020/10448	Q2021-01081	<LOQ	0.0669574	1.4875	29.8548	13.0786	18.1271	6.63289	14.9445	2.02519	0.462021	<LOQ	2.90034	469.106	1.13785	0.0829226	0.0983429	0.0669574	1.4875	29.8548	13.0786	18.1271	6.63289	14.9445	2.02519	0.462021	0.0248255	2.90034	469.106	1.13785	0.0829226	0.0786743	0.0535659	1.19	23.8839	10.4628	14.5017	5.30631	11.9556	1.62015
2020	0.8	2020	Ostkusten	C	Älvkarleby	2020	GB	MAR	C2020/10445	Q2021-01082	<LOQ	<LOQ	0.964679	9.97405	5.27229	9.06883	3.17412	7.46881	1.1561	0.286651	<LOQ	0.980581	119.791	0.244416	0.0496319	0.100782	0.0287472	0.964679	9.97405	5.27229	9.06883	3.17412	7.46881	1.1561	0.286651	0.0254413	0.980581	119.791	0.244416	0.0496319	0.0806256	0.0229977	0.771743	7.97924	4.21783	7.25507	2.53929	5.97505	0.924883
2020	0.8	2020	Ostkusten	X	Hudiksvall	2020	GB	MAR	C2020/10444	Q2021-01084	<LOQ	<LOQ	0.24961	13.1573	7.45235	9.53179	3.19677	7.12615	1.73868	0.614814	<LOQ	0.953151	165.999	0.217093	<LOQ	0.101588	0.0289772	0.24961	13.1573	7.45235	9.53179	3.19677	7.12615	1.73868	0.614814	0.0256448	0.799865	165.999	0.217093	0.0294983	0.0812706	0.0231817	0.199688	10.5258	5.96188	7.62543	2.55742	5.70092	1.39094
2020	0.8	2020	Inland S-M	X	Bollnäs	2020	IN	LIM	C2020/10452	Q2021-01085	<LOQ	<LOQ	0.259229	7.84046	4.71167	6.92201	2.57525	4.57369	0.994865	0.319662	<LOQ	0.397994	80.7763	0.223108	<LOQ	0.100483	0.0286619	0.259229	7.84046	4.71167	6.92201	2.57525	4.57369	0.994865	0.319662	0.0253658	0.397994	80.7763	0.223108	0.0291774	0.0803863	0.0229295	0.207384	6.27236	3.76933	5.53761	2.0602	3.65895	0.795892
2020	0.8	2020	Ostkusten	H	Oskarshamn	2020	BP	MAR	C2020/10443	Q2021-01086	<LOQ	<LOQ	0.293545	15.8313	14.6725	23.1398	8.00189	9.90267	1.7634	0.439181	<LOQ	1.49889	792.656	3.02952	<LOQ	0.100186	0.0285771	0.293545	15.8313	14.6725	23.1398	8.00189	9.90267	1.7634	0.439181	0.0252907	1.49889	792.656	3.02952	0.0290911	0.0801485	0.0228617	0.234836	12.665	11.738	18.5119	6.40151	7.92214	1.41072
2019	0.8	2019	Ostkusten	H	Oskarshamn	2019	BP	MAR	C2019/07710	Q2021-01088	<LOQ	<LOQ	0.427935	7.67845	5.27391	11.0267	4.40861	4.68663	1.05293	0.217931	<LOQ	0.527953	211.952	0.676102	<LOQ	0.0954776	0.0272342	0.427935	7.67845	5.27391	11.0267	4.40861	4.68663	1.05293	0.217931	0.0241022	0.527953	211.952	0.676102	0.027724	0.0763821	0.0217873	0.342348	6.14276	4.21913	8.82133	3.52688	3.7493	0.842345
2020	0.8	2020	Ostkusten	E	Valdemarsvik	2020	BP	MAR	C2020/10451	Q2021-01089	<LOQ	<LOQ	0.567236	13.8303	9.85083	13.5521	4.75168	7.31602	1.08582	0.483949	<LOQ	0.5739	270.206	0.715861	<LOQ	0.0934574	0.0266579	0.567236	13.8303	9.85083	13.5521	4.75168	7.31602	1.08582	0.483949	0.0235923	0.5739	270.206	0.715861	0.0271374	0.0747659	0.0213263	0.453789	11.0643	7.88066	10.8417	3.80134	5.85282	0.868653
					LOQs	2015				PAX15/0296-0317	0.3	0.03	0.2	0.1	0.1	0.2	0.1	0.3	0.2	0.2	0.01	0.01	0.3	0.01	0.01
						2016				PAX001-011	0.12	0.05	0.12	0.03	0.04	0.03	0.02	0.01	0.01	0.01	0.0265215	0.034787	0.09	0.01	0.102781
						2017				PAX18/138-158	0.021	0.021	0.021	0.021	0.008	0.021	0.008	0.021	0.021	0.021	0.018	0.007	0.017	0.02	0.022
						2019-2021				Q2021-1060-1089	0.143667	0.0409799	0.0409799	0.0409799	0.143667	0.143667	0.143667	0.0409799	0.143667	0.143667	0.0362672	0.038726	0.137202	0.0395456	0.0417169
[truncated: 6 more columns]
